1 **Measuring the threat from a distance: insight into the complexity and**  
2 **perspectives for implementing sentinel plantation to test host range of**  
3 ***Xylella fastidiosa***

4  
5 Noemi Casarin<sup>1</sup>, Séverine Hasbroucq<sup>2</sup>, Júlia López-Mercadal<sup>3</sup>, Miguel Ángel Miranda<sup>3</sup>, Claude  
6 Bragard<sup>1</sup>, Jean-Claude Grégoire<sup>2</sup>

7  
8 <sup>1</sup>Earth and Life Institute Applied Microbiology (ELIM), Université catholique de Louvain  
9 (UCLouvain), Croix du Sud 2 bte L7.05.03, 1348 Louvain-la-Neuve, Belgium

10 <sup>2</sup>Spatial Epidemiology lab (SpELL), Université libre de Bruxelles (ULB), CP 160/12, 50 av. F.D.  
11 Roosevelt, 1050 Bruxelles, Belgium

12 <sup>3</sup>Zoologia Aplicada i de la Conservació (ZAP), Universitat de les Illes Balears (UIB), Cra. De  
13 Valldemossa, km 7.5, 07122 Palma de Mallorca, Illes Balears, Spain

14  
15 Correspondence: Jean-Claude Grégoire, e-mail : [jean-claude.gregoire@ulb.be](mailto:jean-claude.gregoire@ulb.be) ;

16 Claude Bragard, e-mail : [claude.bragard@uclouvain.be](mailto:claude.bragard@uclouvain.be)

17  
18 **Abstract**

19 The sentinel plantation concept consists of assessing the impact of exotic factors, such as  
20 pests and pathogens, on plants of interest by planting them out of their native range. This tool is a  
21 way to enhance knowledge for pest risk analysis (PRA) by guiding decisions on how quarantine  
22 organisms should be regulated and where to focus prevention and surveillance efforts for an early  
23 detection. In this study, the sentinel method was used in the case of research on *Xylella fastidiosa*,  
24 a plant pathogenic bacterium that has recently been found established in southern Europe, but  
25 whose potential impact and possible host range are still poorly documented in northern areas  
26 where the bacterium is not known to occur. To improve knowledge on the susceptibility of  
27 potential hosts of *X. fastidiosa* in northern Europe, a sentinel plantation of *Prunus domestica* cv.  
28 Opal, *Quercus petraea* and *Salix alba* was established in the *X. fastidiosa*-infected area of  
29 Majorca. In order to assess the circulation of the bacterium in the sentinel plot and around it,  
30 surveys of the local flora and insect vectors were carried out, as well as the planting of a network  
31 of rosemary "spy plants". Symptomatic monitoring and molecular analyses were performed on  
32 the sentinel plants for four years. During these years, *X. fastidiosa* was never detected in our

33 sentinel plants most likely because of the low infectivity pressure recorded in the surroundings.  
34 This study underlines the complexity of conducting sentinel plantation assays combined with *X.*  
35 *fastidiosa* research, highlighting the need for long-term investigation and questioning the  
36 efficiency of the sentinel tool. However, this study is placed in perspective with other valuable  
37 sentinel plantations. It also highlights the complementarity of the tool and proposes elements to  
38 improve or reorient the implementation of future sentinel projects.

39  
40 **Keywords**  
41 biological invasions, *ex-patria* planting, Majorca, northern Europe, pest risk analysis, *Prunus*  
42 *domestica*, *Quercus petraea*, *Salix alba*

## 45 Introduction

46  
47 The world sustainability is threatened by outbreaks of invasive pests and pathogens  
48 increasingly spreading around the globe (Simberloff et al. 2013; Diagne et al. 2021). These  
49 organisms largely travel to new areas through global trade, with living plants or with wood  
50 packaging material, which are considered as the main pathways of plant-related organism  
51 introductions (Kenis et al. 2007; Liebhold et al. 2012; Santini et al. 2013; Meurisse et al. 2019).  
52 These agents often expand by outcompeting native species because they are transported far from  
53 their natural enemies (“enemy release hypothesis”; Keane and Crawley 2002; Colautti et al.  
54 2004), allowing them to allocate resources to growth and fecundity instead of defense, enhancing  
55 their fitness (“evolution of increased competitive ability” hypothesis; Blossey and Notzold 1995;  
56 Manfredini et al. 2013). They may trigger epidemics, sometimes on new hosts whilst they were  
57 less harmful to their native hosts, as they have not co-evolved with the new local plants that lack  
58 of specific defense mechanisms (Pimentel et al. 2001; Aukema et al. 2011). Apart from trade and  
59 globalization, climate change and intensive land-use are also factors enhancing outbreaks by  
60 decreasing the resilience of the agricultural production systems and of forests (Walther et al.  
61 2009; Bosso et al. 2016).

62

63 Preventing the introduction and the establishment of pests and pathogens in new areas is  
64 the most efficient tool for mitigating the consequences of a disease in terms of cost, biodiversity  
65 conservation and human impact (Barham et al. 2016). This includes the implementation of a pest  
66 risk analysis (PRA), which is an assessment giving biological, scientific and economic  
67 information on a particular organism (Aukema et al. 2011; Tomoshevich et al. 2013; EFSA PLH  
68 Panel 2018) to understand its potential impact and how it should be regulated (Parker et al. 1999;  
69 EU 2000; Liebhold et al. 2012). If considered harmful, the first measure taken to avoid its  
70 introduction might be its inclusion in a quarantine list implying either thorough inspections of  
71 imported plants before or after the importation, plant production in pest-free areas or sites of  
72 production, or complete prohibition of trade or production of its native host plants (EU 2000).

73  
74 However, these measures are not fully effective by themselves. Inspections can fail to  
75 intercept all the potential pests and pathogens travelling through plant trade (Kenis et al. 2007;  
76 Eschen et al. 2015, 2017, 2019). First, these agents can be invisible to the naked eye because of  
77 their intrinsic nature or because there are in a latent form or in an endophytic stage on their traded  
78 hosts, leading to asymptomatic infections (Stergiopoulos and Gordon 2014; Migliorini et al.  
79 2015). Secondly, despite the prioritization of inspected organisms through PRA, the massive  
80 volume of traded materials makes the systematic control of each plant inoperable, only batches  
81 will be thoroughly examined (Britton et al. 2010; Eschen et al. 2015). Finally, PRA relies on  
82 prior awareness and knowledge of a pest and this knowledge is not always available; several  
83 agents, including non-catalogued taxa, harmless in their native region, are unknown to be  
84 invasive and pathogenic prior their introduction in a new land, and escape controls (Brasier 2008;  
85 Britton et al. 2010; Tomoshevich et al. 2013). The few of them that manage to establish and  
86 cause significant damage are then often discovered too late to avoid outbreaks. Such is the case  
87 for some of the most damaging organisms of temperate forests that have occurred in recent years,  
88 which were unknown as pests prior to their introduction in a new area (Britton et al. 2010).  
89 Examples are the epidemics of Dutch elm disease caused by *Ophiostoma ulmi* Buisman and *O.*  
90 *novo-ulmi* Brasier that decimated billions of elm trees in Europe and America in the 20<sup>th</sup> century  
91 (Brasier and Buck 2001), or the massive damage to pines in Asia (Zhao et al. 2008) and Europe  
92 (Soliman et al. 2012) caused by the pine wood nematode, *Bursaphelenchus xylophilus* (Steiner  
93 and Buhner 1934) Nickle, 1970, an organism well tolerated by its native pine hosts in North  
94 America (Akbulut and Stamps 2012).

95

96           A way to enhance knowledge about potentially damaging organisms to improve  
97 biosecurity systems would be to expose plants of interest out of their native range to study their  
98 susceptibility to local organisms in specific relevant locations, e.g. a frequent plant exporting  
99 country (Roques et al. 2015; Barham et al. 2016). These plants would represent sentinels for their  
100 species in the foreign land. They provide an early warning for potential threats and additional  
101 information for PRA to set preventing measures and to know where the efforts for plant  
102 protection should be focused (Barham et al. 2016; Mansfield et al. 2019). An EPPO standard  
103 document was published in 2020, "PM 3/91 Standard on Sentinel woody plants" (EPPO 2020), to  
104 explain the approach and to provide guidance to carry out sentinel plant studies to identify new  
105 pest risks.

106

107           Sentinel plant research can be carried out by different ways (Britton et al. 2010). A first  
108 way is through botanical gardens and arboreta gathering a collection of specimens from all over  
109 the world, which are generally out of their area of origin and exposed to local agents. For such  
110 studies, the International Plant Sentinel Network (IPSN), working closely with National Plant  
111 Protection Organizations (NPPOs), was created. It connects the botanical gardens and arboreta  
112 staff around the world and gives them tools and expertise to monitor and to identify new pests  
113 and pathogens (Barham et al. 2016). Tomoshevich et al. (2013) for example, discovered 29 new  
114 pest-host associations whose 18 noticeably damaging for European trees by studying European  
115 and Eurasian trees in Siberian gardens in Russia. However, in botanical gardens and arboreta, the  
116 number of representatives of each plant species is generally limited (Roques et al. 2015), the trees  
117 are often large and hence difficult to examine in detail, and they are usually subject to pesticide  
118 treatments or other management practices, which ensure plant health in the gardens (Eschen et al.  
119 2019). Furthermore, gardens are often located in urban areas distant from the habitats of potential  
120 pests. All these reasons reduce the likelihood for an organism to reach and infect a specific plant  
121 species in an arboretum (Britton et al. 2010). A second way to conduct sentinel plant researches  
122 is directly establishing actual plantations of exotic plants of interest in an environment where we  
123 want to study the impact of local pests and pathogens, the so-called "sentinel plantations"  
124 (Roques et al. 2015) or "*ex-patria* plantings" (Eschen et al. 2019). For example, Roques et al.  
125 (2015) and Vettraino et al. (2015) established two sentinel plantations of European tree species in

126 China to investigate new pest-host associations potentially threatening to Europe that may  
127 emerge as a result of trade.

128  
129 On the other hand, some well-known pathogens are still restricted to one part of the world  
130 and their potential host range in non-infected areas is uncertain and must be investigated. Such is  
131 the case of the phytopathogenic bacterium *Xylella fastidiosa* Wells et al., 1987, with more than  
132 650 reported host plant species, and for which the host range continues to extend as the bacterium  
133 enters new areas (EFSA 2022). While the threat of *X. fastidiosa* is definite for the European  
134 Mediterranean flora, the potential impact for northern areas is uncertain as most of the flora in  
135 these regions has never been exposed to the bacterium and probably contains many unreported  
136 hosts. The objective of our study was therefore to establish a sentinel plantation with European  
137 northern trees in a *X. fastidiosa* infected area in order to study the potential host range for these  
138 still-uninfected regions.

139  
140 The gammaproteobacterium *X. fastidiosa* (Xanthomonadaceae) is strictly limited to the  
141 foregut of xylem sap-feeding insect vectors, mainly leafhoppers and spittlebugs (Hemiptera,  
142 Cicadomorpha) (Redak et al. 2004; Almeida et al. 2005; Chatterjee et al. 2008) and to the xylem  
143 vessels of its host plants. While many listed hosts are asymptomatic, the bacterium causes severe  
144 outbreaks on several crops, ornamental plants and shade trees generally provoking leaf-scorching  
145 that could lead to plant death (EFSA PLH Panel 2018). First limited to the Americas, the  
146 bacterium is currently regulated in Europe as a quarantine organism under the Council Directive  
147 2000/29/EC (EU 2000). Between 2014 and today, the Europhyt database recorded 51  
148 interceptions of *X. fastidiosa* in plants for planting and four interceptions of leafhoppers  
149 (EUROPHYT Online database; EFSA PLH Panel 2018). Despite the border controls and EU  
150 prevention measures, a first focus of *X. fastidiosa* in Europe was discovered in 2013 in Apulian  
151 olive groves (Italy), for which more than 21 million olive trees were estimated to be affected in  
152 2018 (Saponari et al. 2019). The bacterium was then identified in mainland France, in Corsica  
153 (Denancé et al. 2017), in mainland Spain, in the Balearic Islands (Olmo et al. 2017), in another  
154 region of Italy (Tuscany) (Saponari et al. 2019) and in Portugal (EFSA PLH Panel 2019b;  
155 EUROPHYT Online database). Divided into several subspecies (mainly subsp. *fastidiosa*, subsp.  
156 *multiplex*, and subsp. *pauca*; Schaad et al. 2004) and more finely according to its sequence type  
157 (ST) (Scally et al. 2005; Yuan et al. 2010), 11 different STs were identified throughout Europe

158 revealing multiple independent *X. fastidiosa* introduction events (EFSA 2021; Cuntly et al. 2022).  
159 Phylogeny studies allowed to date back to the different entries of *X. fastidiosa* in the specific  
160 European regions, indicating entrance in the 1980s, 1990s and 2000s according to the area, i.e.  
161 well before the official identification of the pathogen's establishment on the continent. *Xylella*  
162 *fastidiosa* is therefore a perfect example of an organism escaping control due to the complexity of  
163 detection given the asymptomatic pool of hosts, the potentially long latent period limiting visual  
164 inspection, and the number of reported and supposed-unreported hosts, as well as the lack of  
165 specific surveillance programs and the limited availability of specific diagnostic tools in the past.  
166 Its movement into Europe has been caused in part by the trade of asymptomatic coffee plants  
167 imported from Latin America (EFSA PLH Panel 2015; Denancé et al. 2017).

168  
169 However, it has been shown that eradication of *X. fastidiosa* may be complex if not  
170 impractical once it is well established and has reached a large geographical extent (Strona et al.  
171 2017; EFSA PLH Panel 2019a). Therefore, while entries can hardly be prevented, early detection  
172 is primordial to limit damage of outbreaks. The probability of early detection would increase by  
173 improving knowledge on where the bacterium is most likely to establish in order to conduct  
174 effective surveillance. In fact, performing detection tests on every plant in random areas is neither  
175 efficient nor conceivable as it would exceed any diagnostic capability considering the wide range  
176 of potential host plants (EFSA PLH Panel 2016). Targeting the main host plants and establishing  
177 a prioritization list, is essential to know where to focus resources and monitoring efforts.

178  
179 To enhance knowledge on the susceptibility of potential hosts of *X. fastidiosa* in northern  
180 Europe, a sentinel plantation of northern plant species *Prunus domestica* cv. *Opal*, *Quercus*  
181 *petraea* and *Salix alba*, was established in the *X. fastidiosa*-infected area of Majorca (Balearic  
182 Islands, Spain). There, the bacterium is considered widespread and well established. Three  
183 different STs belonging to two subspecies (*X. fastidiosa* subsp. *fastidiosa* ST1, and *X. fastidiosa*  
184 subsp. *multiplex* ST81 and ST7) have been identified on several hosts including wild olives,  
185 cultivated olives, almonds, grapes and figs (Olmo et al. 2021). They are mainly transmitted by the  
186 *Philaenus spumarius* Linnaeus, 1758 (Aphrophoridae) vector and to a lesser extent, by  
187 *Neophilaenus campestris* Fallén, 1805 (Aphrophoridae) (López-Mercadal et al. 2021). This study  
188 experiments the sentinel plantation tool in the case of *X. fastidiosa* research. The outcome  
189 questions the efficiency of the method, at least in this particular case, and highlights the

190 complexity of its implementation. However, it provides a methodology and several perspectives  
191 for future sentinel projects.

192

193

## 194 **Methods**

195

### 196 **Preliminary tests and plant movement**

197 The establishment and the monitoring of the sentinel plantation was achieved with the  
198 collaboration of the ZAP group of the University of the Balearic Islands (UIB). First, the  
199 agreement of the local government and the UIB authorities had to be obtained. Then, the plant  
200 material was bought at the Calle-Plant nursery in Wetteren, Belgium. It consisted in dormant  
201 material: 30 *Salix alba* 0/1 80/120, 30 *Quercus petraea* 2/0 80/100 and 30 *Prunus domestica* cv.  
202 Opal 2 years grafted on Myrobolan or St Julien. Although all the plants were equipped with a  
203 phytosanitary certificate, *X. fastidiosa* specific detection tests were performed on several twigs of  
204 each plants to make sure the initial material was free of the bacterium. For this purpose, three  
205 branch parts of each plant were collected and bark-peeled. They were chopped and their DNA  
206 was extracted according to the CTAB-based DNA extraction protocol specific for *X. fastidiosa*  
207 plant samples ("PM 7/24 (4) *Xylella fastidiosa*", EPPO 2019). The detection was then performed  
208 by PCR (Minsavage et al. 1994). After this double check, the ninety plants were wrapped in  
209 hessian bags filled with wood chips and were brought by truck from Belgium until the UIB  
210 campus in Palma (Majorca, Balearic Islands) on March 2018. The chips were humidified during  
211 the 2-day trip to avoid root dryness.

212

### 213 **Location and establishment**

214 The location of the plot was chosen with the UIB collaborators mainly based on the ease  
215 of connection to an irrigation system, as well as on the observation of *Philaenus spumarius* and  
216 *Neophilaenus campestris* nymphs on the ground vegetation and the presence of host plants such  
217 as wild olive and almond trees. For the positioning of the plants in the plot, the JMP<sup>®</sup> software  
218 was used to generate nine blocks, each one composed by three plants of each species randomly  
219 distributed (Fig. 1). The scheme was divided by blocks to take into account the potential  
220 gradients such as the slope, irrigation distribution, or sunlight. The trees were planted directly  
221 into the ground to promote the growth of the root system and to enable them to survive

222 throughout the season (Fig. 2). The soil was compact and rocky and was dug thanks to machines  
223 (Fig. 3). In every hole, about 20 liters of breeding soil were poured. The trees were separated  
224 from each other by 1.50 m and the whole plantation covered a total area of 12 m<sup>2</sup>. The irrigation  
225 system was established in the second year of the plantation. It consisted in three closed loops of  
226 pipe with one dripper per plant, allowing a constant pressure in all pipes and the same amount of  
227 water per plant (Fig. 1). The climatic data were followed through the season thanks to a HOBO<sup>®</sup>  
228 device placed in the middle of the plantation.

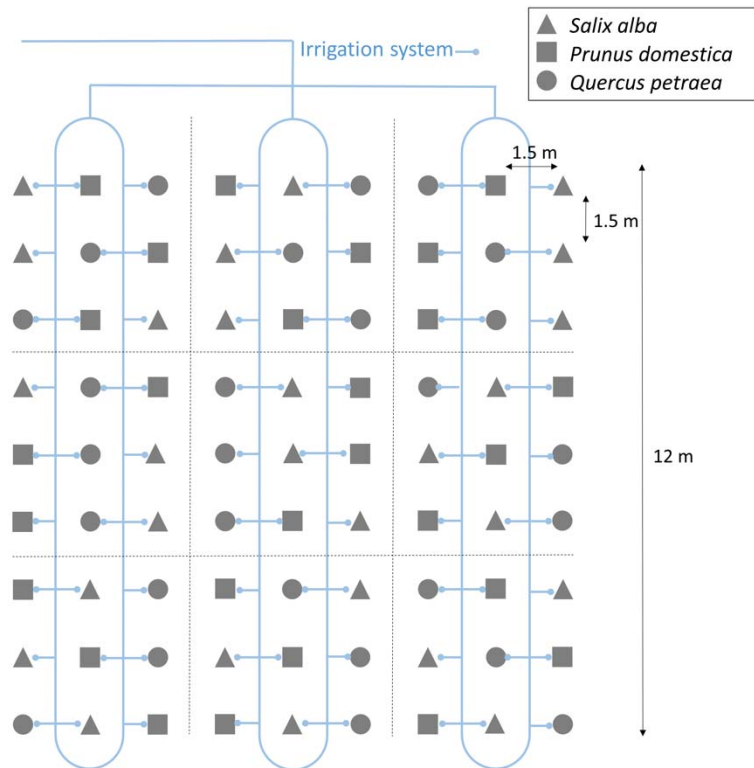

229  
230 **Figure 1.** Scheme of the sentinel plantation of *Salix alba*, *Prunus domestica* cv. Opal and  
231 *Quercus petraea*.  
232 The dotted lines delimit nine blocks in which there are three plants of each species distributed  
233 randomly (JMP<sup>®</sup>). The solid blue line is for the representation of the irrigation system consisting  
234 in three closed loops of pipe with one dripper per plant.  
235



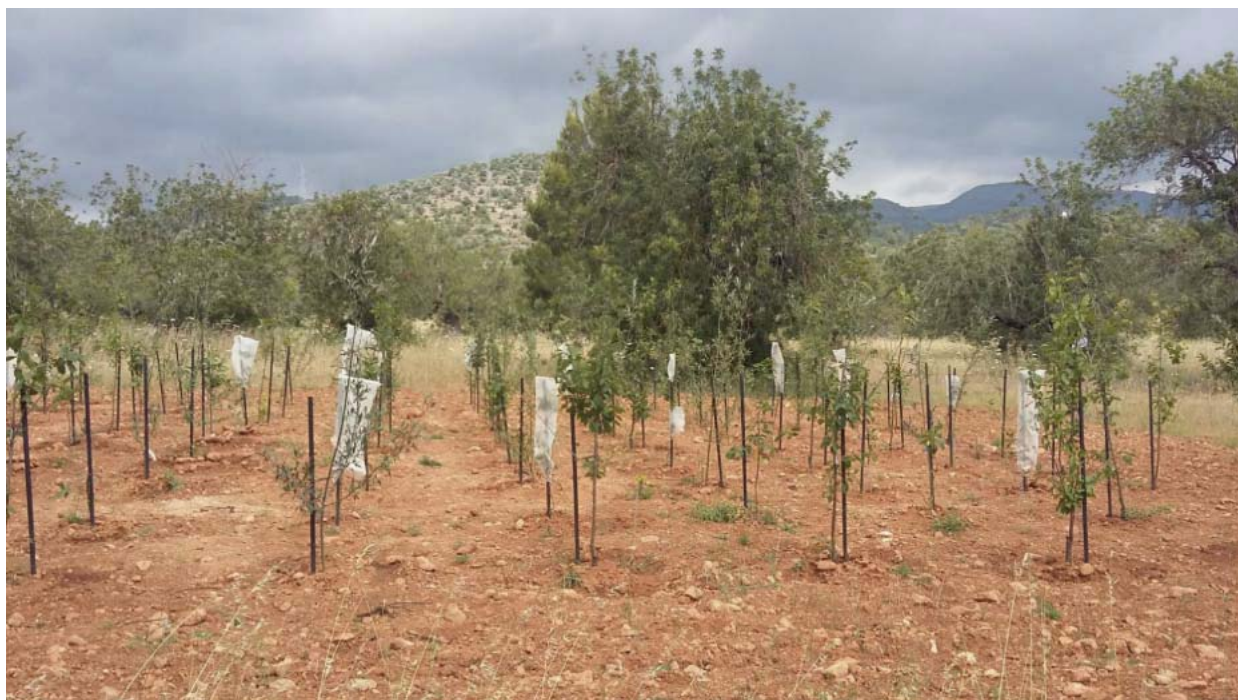

236

237 **Figure 2.** Picture of the Belgian sentinel plantation in Palma (Majorca, Balearic 237  
238 Island) in  
239 May 2018.

239

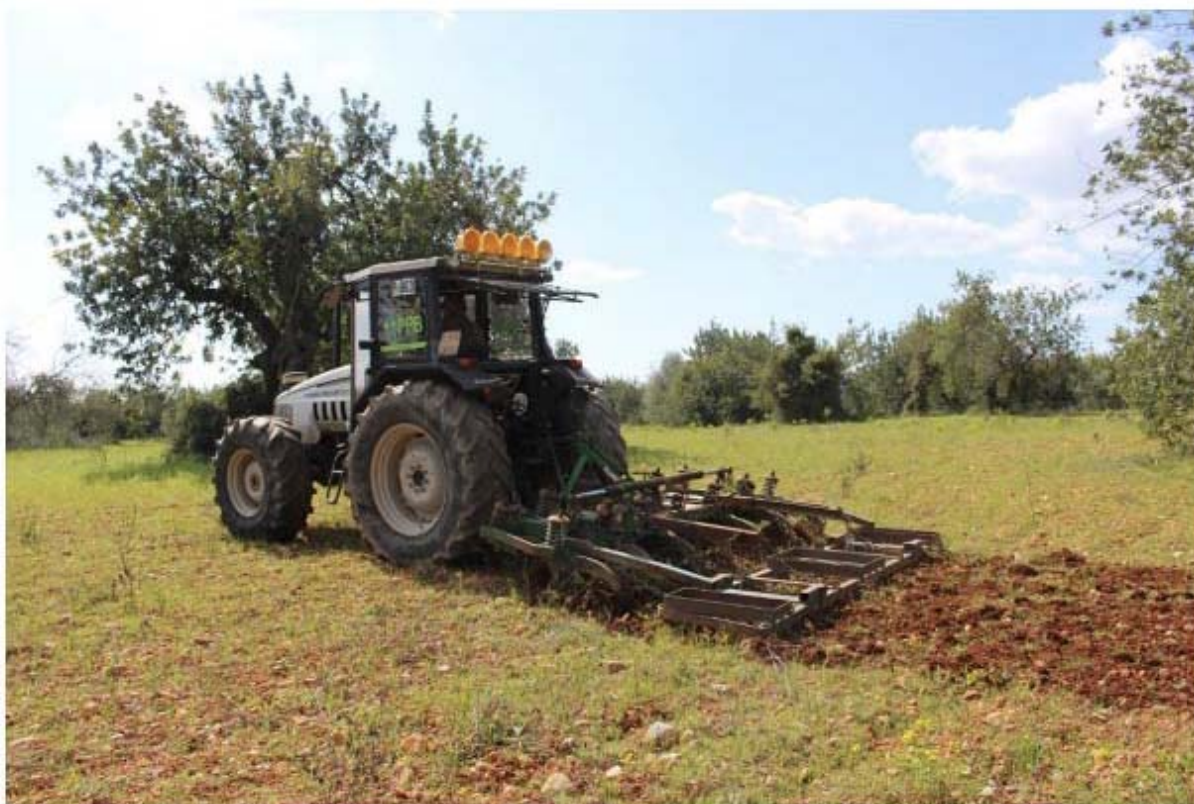

240

241 **Figure 3.** Preparing the ground for planting the sentinel trees.

242 The pictures highlight the difficulty of establishing the sentinel plantation in the dry, compact and  
243 rocky soil of the area.

244

### 245 Exploring the surroundings

246 To monitor the circulation of the bacterium in the plot and around it, a 100-m demarcated  
247 area was organized around the plantation. In this area, i. a floristic inventory was carried out; ii.  
248 insect vectors were sampled; iii. a rosemary “spy plant” network was established (Fig. 4).

249

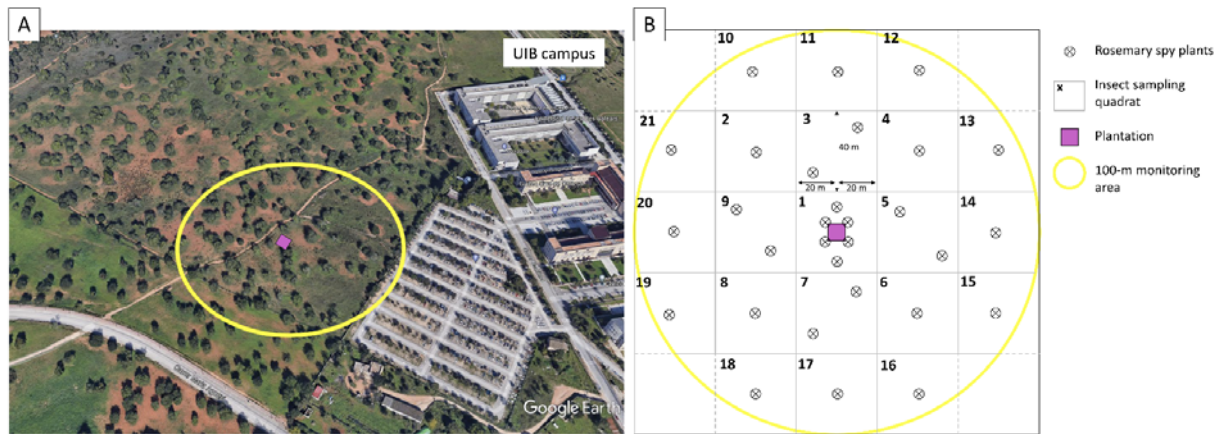

250

251 **Figure 4.** Surroundings of the sentinel plantation.

252 **A.** Google Earth view (Google Earth Pro, satellite image of May 6, 2021) of the UIB campus  
253 with the location of the sentinel plantation (purple square) and the 100-m demarcated area around  
254 the plantation (yellow circle) **B.** Scheme of the plantation and the demarcated area. In the  
255 demarcated area, a floristic inventory was carried out, insect vectors were sampled in determined  
256 quadrat and a rosemary “spy plant” network was established by planting evenly seedlings around  
257 the plantation.

258

### 259 Floristic inventory

260 To locate and assess the proportion of *X. fastidiosa* host plants in the area and to follow  
261 the eventual appearance of symptoms, a floristic inventory was carried out. It consisted in  
262 identifying and mapping the tree layer of the demarcated area. An identification of the main  
263 herbaceous species was also performed with the help of local collaborators and of a flora  
264 determination key handbook.

265

### 266 Rosemary network

267 44 *Rosmarinus officinalis* were planted around the campus: 32 plants evenly positioned in  
268 the demarcated area (Fig. 4) and 12 plants in other places of the campus. The idea was to choose  
269 a robust plant adapted to local environmental conditions and which is quite susceptible to several

270 subspecies of *X. fastidiosa*. Planting and regularly sampling these susceptible plants for bacterial  
271 detection provide a spy network allowing to control the circulation of the bacteria in the vicinity  
272 of the plantation. The plants were bought in a local nursery in March 2018. They were first  
273 checked for *X. fastidiosa* presence with molecular tests before planting them, consisting of a  
274 CTAB-based DNA extraction followed by PCR of Minsavage et al. (1994). For sampling, about  
275 15 leaves were collected on each plant, starting with symptomatic ones, and were processed right  
276 away in the local laboratory. The midrib and the petiole were sectioned and the total DNA was  
277 extracted with the CTAB-based extraction procedure (EPPO 2019). The DNA samples were then  
278 sent to Belgium and were processed at UCLouvain by PCR of Minsavage et al. (1994) in the first  
279 three years, and by real-time PCR of Harper et al. (2010) in the fourth year-final testing. In this  
280 final year, about five twigs per plant were collected as well and were processed in the same way.

281

### 282 ***Insect sampling and testing***

283 Insects were sampled with two objectives. On the first hand, they were collected to be  
284 tested for *X. fastidiosa* presence by PCR (Minsavage et al. 1994) and quantitative PCR (Harper et  
285 al. 2010) to check for the circulation of the bacterium around the plantation. On the other hand,  
286 during the first year, the vector population density was assessed every month to determine the  
287 variability of the potential transmission during the season. For this study, the 100-m area around  
288 the plot was divided in 25 blocks (Fig. 4). In each block, the same number of insect samples were  
289 undertaken. According to the development stage of the insect, the sampling method was adapted.  
290 For the nymphal stage, a frame of 50 cm x 50 cm was used (0.25 m<sup>2</sup>) and was thrown randomly  
291 four times in each block. The nymphs present in the surface delimited by the frame were counted.  
292 In total, 84 samples were undertaken throughout the demarcated area and the number of  
293 nymphs/m<sup>2</sup> could be estimated. Although *X. fastidiosa* is lost after every molt, the nymphs can  
294 also get infected with it (Purcell and Finlay 1979; Redak et al. 2004). Therefore, in addition to the  
295 density study, three nymphs of *P. spumarius* and three nymphs of *N. campestris* were collected in  
296 each block for bacterial detection to potentially already have an indication of the circulation of  
297 the bacteria in the plot. This number was chosen in order to not affect the vector abundance  
298 around the plot for the rest of the season.

299

300 Regarding insects at adult stage, the sampling was carried out with sweeping nets. Two  
301 samples per block were undertaken in the ground layer, one sample corresponding to ten

302 sweepings. The sweepings were done homogeneously in each block in order to cover all the area.  
303 In total, 42 samples were undertaken throughout the demarcated area and the number of  
304 adult/swept was measured. Again, only three insects per species (*P. spumarius* and *N.*  
305 *campestris*) were collected per block. Due to the small number of insects found in summer, the  
306 tree layer was also sampled. All the wild olive, almond and carob trees in the demarcated area  
307 were hit fifteen times with sweeping nets, distributed evenly on the plant in order to cover its  
308 entire attainable foliage surface. The number of adult/tree could be assessed.

309  
310 The insects collected were placed at -20 °C, then stored in ethanol 70 % and were sent to  
311 Belgium where they were processed. The eyes were removed and the DNA of the head together  
312 with the mouthparts was extracted using the CTAB-based protocol (EPPO 2019). The extracted  
313 DNA was then processed by PCR of Minsavage et al. (1994), by nested PCR of Cruaud et al.  
314 (2018) or by quantitative PCR of Harper et al. (2010).

315

### 316 **Sentinel plantation monitoring**

317 Visual inspections were carried out for each sentinel tree. The appearance of *Xylella*-like  
318 symptoms was cautiously observed and wilting, shoot dieback, desiccation, defoliation or any  
319 change in leave color were reported. The evolution of the size of the different plants was also  
320 monitored, as well as the presence of *Xylella*-vectors or of other pests or organisms. In parallel,  
321 molecular analyses were performed on each plant. One sample per plant was collected, consisting  
322 of ten leaves per plant and 4-5 small twigs collected from all sides of the plant, but prioritizing  
323 symptomatic areas if there were any. DNA extractions were carried out with the CTAB-based  
324 protocol (EPPO 2019) on leaf midribs, on petioles and on the twigs after bark peeling and cutting  
325 them into small pieces. The DNA samples were then sent to Belgium where they were processed  
326 by PCR of Minsavage et al. (1994) in the first three years. In the final-testing of the fourth year,  
327 two samples per plants were collected, one sample consisting of 10 different twigs distributed  
328 throughout the plant together with 10 to 20 leaves, always prioritizing symptomatic parts. After  
329 extraction, they were processed by PCR of Minsavage et al. (1994) as well as by real-time PCR  
330 of Harper et al. (2010). No fertilizer was applied and no pruning was carried out in the winter, to  
331 allow the plants to develop naturally and not to cut potentially infected sections.

332

### 333 **Sowing ground vegetation**

334 Because the planting of the sentinel plants with machines had removed the herbaceous  
 335 layer in the sentinel plantation, which could prevent insects from reaching the trees, it was  
 336 decided resowing grass in February of the second year to reconstitute this layer. The seed  
 337 consisted of a universal mix of Asteraceae, Fabaceae and Poaceae.

338

### 339 **Monitoring of the plantation for four years**

340 The planning of the plantation monitoring during the four years is available in Table 1.  
 341 The first year, it was decided to monitor the plantation and the demarcated area almost every  
 342 month of the vector-season to assess the vector density fluctuation and to measure the rate of  
 343 infection, if any, of the different plant species. In March, nymphs were sampled while from May  
 344 to October, insect adults were monitored. Several rosemary plants had desiccated already in May  
 345 of the first year. Therefore, the dead ones were replaced in May and also in February of the  
 346 following year. From the second year onwards, the sampling periods were chosen to correspond  
 347 more or less to the beginning and the end of the highly infectious period of *X. fastidiosa* carried  
 348 by the insect vectors, respectively June and October, avoiding the estivation periods of insects.  
 349 The third year was impacted by the Covid-19 crisis and only one sampling campaign could be  
 350 carried out in October 2020.

351

352 **Table 1.** Four-year schedule of the establishment and monitoring of the plantation and of the  
 353 demarcated area.

| Task                                   | 2018  |     |     |     |      |     | 2019 |     |     | 2020                  | 2021 |     |     |
|----------------------------------------|-------|-----|-----|-----|------|-----|------|-----|-----|-----------------------|------|-----|-----|
|                                        | March | May | Jun | Jul | Sept | Oct | Feb  | Jun | Oct |                       | Oct  | Jun | Oct |
| Sentinel establishment                 |       |     |     |     |      |     |      |     |     | C<br>O<br>V<br>I<br>D |      |     |     |
| Rosemary network establishment         |       |     |     |     |      |     |      |     |     |                       |      |     |     |
| Floristic inventory                    |       |     |     |     |      |     |      |     |     |                       |      |     |     |
| Vector density                         |       |     |     |     |      |     |      |     |     |                       |      |     |     |
| Vector sampling                        |       |     |     |     |      |     |      |     |     |                       |      |     |     |
| Sentinel plants monitoring and testing |       |     |     |     |      |     |      |     |     |                       |      |     |     |
| Rosemary monitoring and testing        |       |     |     |     |      |     |      |     |     |                       |      |     |     |
| Sowing herbaceous vegetation           |       |     |     |     |      |     |      |     |     |                       |      |     |     |

354

355

## 356 **Results**

357

## 358 **Insight into surrounding plants**

359 About 170 trees were inventoried: 134 carob trees, 31 wild olive trees, 5 almond trees and  
360 2 pine trees. Their distribution can be observed at the Fig. 5. The wild olive trees and the almond  
361 trees are both host plants of *X. fastidiosa*. Therefore, 36 host plants of the bacterium were  
362 identified in the 100 m around the plot. Among these host plants, 64% showed typical leaf  
363 scorching symptoms of *X. fastidiosa*. Concerning the ground vegetation, the identified plants  
364 were mainly: *Conium maculatum* (Apiaceae), *Foeniculum vulgare* (Apiaceae), *Cichorium intybus*  
365 (Asteraceae), *Dittrichia viscosa* (Asteraceae), *Galactites tomentosa* (Asteraceae), *Euphorbia*  
366 *medicaginea* (Euphorbiaceae) and many Poaceae (*Oryzopsis* sp. and others).

367

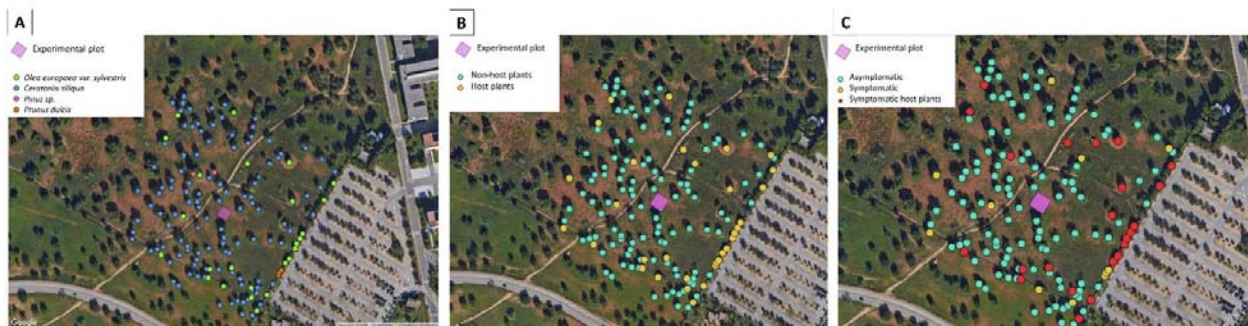

368

369 **Figure 5.** Tree species inventory, host and health status around the sentinel plantation.

370 **A.** Map of the different tree species in the area of 100-m around the plantation. The pink square is  
371 the experimental plot (the sentinel plantation). The green dot are for *Olea europaea* var. *sylvestris*  
372 (wild olive tree), the blue dot for *Ceratonia siliqua* (carob tree), the pink dot for the *Pinus* sp.  
373 (pine tree) and the orange dot for the *Prunus dulcis* (almond tree). **B.** Map of the host status of the  
374 trees located in the area of 100-m around the plantation. The green dots are the non-host plants of  
375 *X. fastidiosa* and the yellow dots are the host plants of the bacterium. **C.** Map of the symptomatic  
376 trees located in the 100-m area around the plantation, presenting typical *X. fastidiosa* leaf  
377 scorches. The green dots are the asymptomatic plants, the yellow dots the symptomatic plants and  
378 the red dots the symptomatic plants that are host plants of the bacterium. The maps were created  
379 with the QGIS software with maps from Google Earth, Imagery ©2018, DigitalGlobe.

380

381 Regarding the rosemary spy plants, molecular tests carried out over four years have not  
382 detected any bacteria in the collected samples. The rosemary have suffered from the heat and  
383 many of them died. In May of the first year, the 12 rosemary planted in the campus were already  
384 all desiccated. The following year they were replaced, as well as six rosemary plants located in  
385 the demarcated area. However, they did not last one year. Soil tilling performed in the  
386 demarcated area by the local gardeners also removed several plants from the ground. Only 12 out

387 of 44 rosemary survived the four years of the experiment. The first year, symptoms already  
388 started to appear in May, and at the end of the first season, two third of the plants presented  
389 typical *Xylella*-symptoms, starting with chlorosis at the tip of the leaves, which extends to all the  
390 leaf surface and which turned necrotic (Fig. 6).  
391

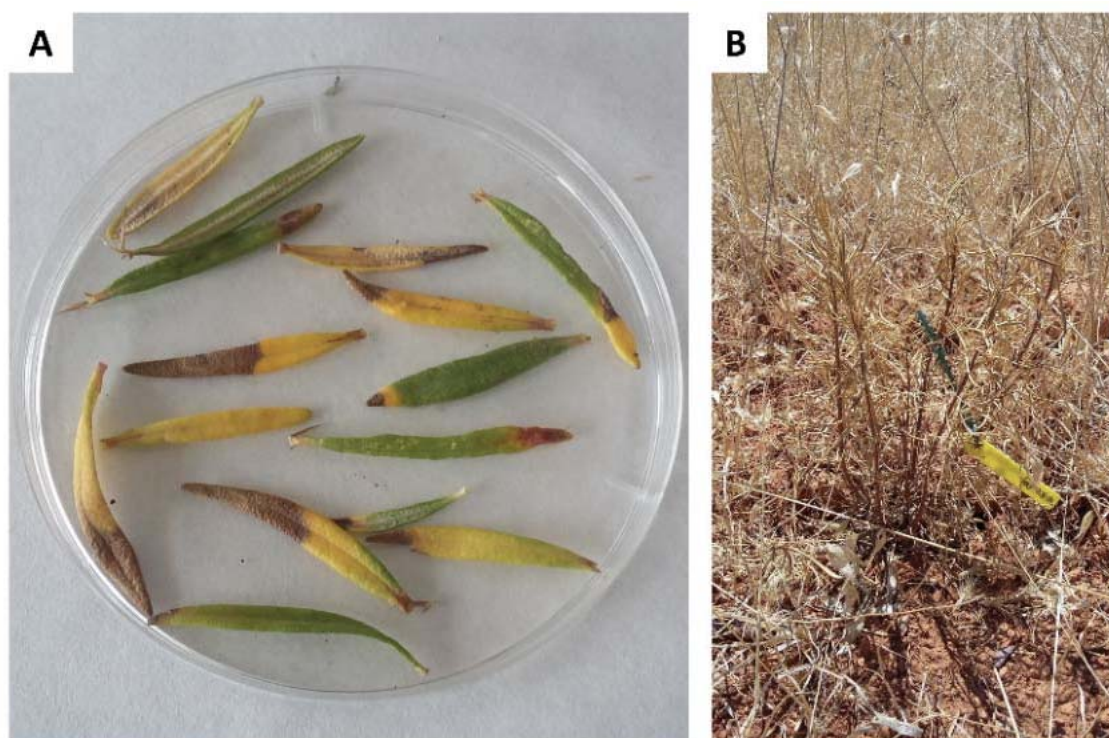

392  
393 **Figure 6.** Rosemary health state.  
394 **A.** Sampled leaves of rosemary presenting *X. fastidiosa*-typical leaf scorch symptoms (May  
395 2018). **B.** Dry and dead rosemary on the field (July 2018).  
396

### 397 **Insect sampling**

398 Molecular tests carried out over four years have never detected any bacteria in the  
399 collected insects of the demarcated area.

400  
401 During the first season, the amount of sampled insects of both species fluctuated  
402 depending on the month. This fluctuation can be observed in Fig. 7. In March, the foam produced  
403 by the nymphs could be easily observed and in total, 40 nymphs of *P. spumarius* (1.9 nymphs/m<sup>2</sup>,  
404 mainly at nymphal stage 3-4) and 89 nymphs of *N. campestris* (4.2 nymphs/m<sup>2</sup>, mainly at  
405 nymphal stage 2-3) were sampled. The nymphs of *N. campestris* were always found on Poaceae  
406 while *P. spumarius* ones were sampled on Asteraceae (*Carduus* sp.), Euphorbiaceae and other

407 herbaceous plants. At the beginning of May, local collaborators observed nymphs of *P.*  
 408 *spumarius* on one *S. alba* plant in the plantation, as well as two adults of *P. spumarius* on *P.*  
 409 *domestica*.

410  
 411 At the end of May, the adult stage was already present and the sampling on the ground  
 412 vegetation revealed less individuals than when nymphs were sampled the previous months. The  
 413 number of adults per swept was below one, with 0.04 *P. spumarius*/swept and 0.03 *N.*  
 414 *campestris*/swept. In June, the herbaceous layer had dried and almost no insects were found in the  
 415 ground vegetation. Very few insects were also sampled in the tree canopy. In September, more *P.*  
 416 *spumarius* adults were sampled in the tree canopy, however the number remained low with about  
 417 0.2 adults/tree. In October, new fresh herbs had grown and the highest number of *N. campestris*  
 418 over the season was reached in the ground vegetation (0.13 adults/swept), while a similar density  
 419 as the one sampled in May has been found for *P. spumarius* (0.03 adults/swept).

420

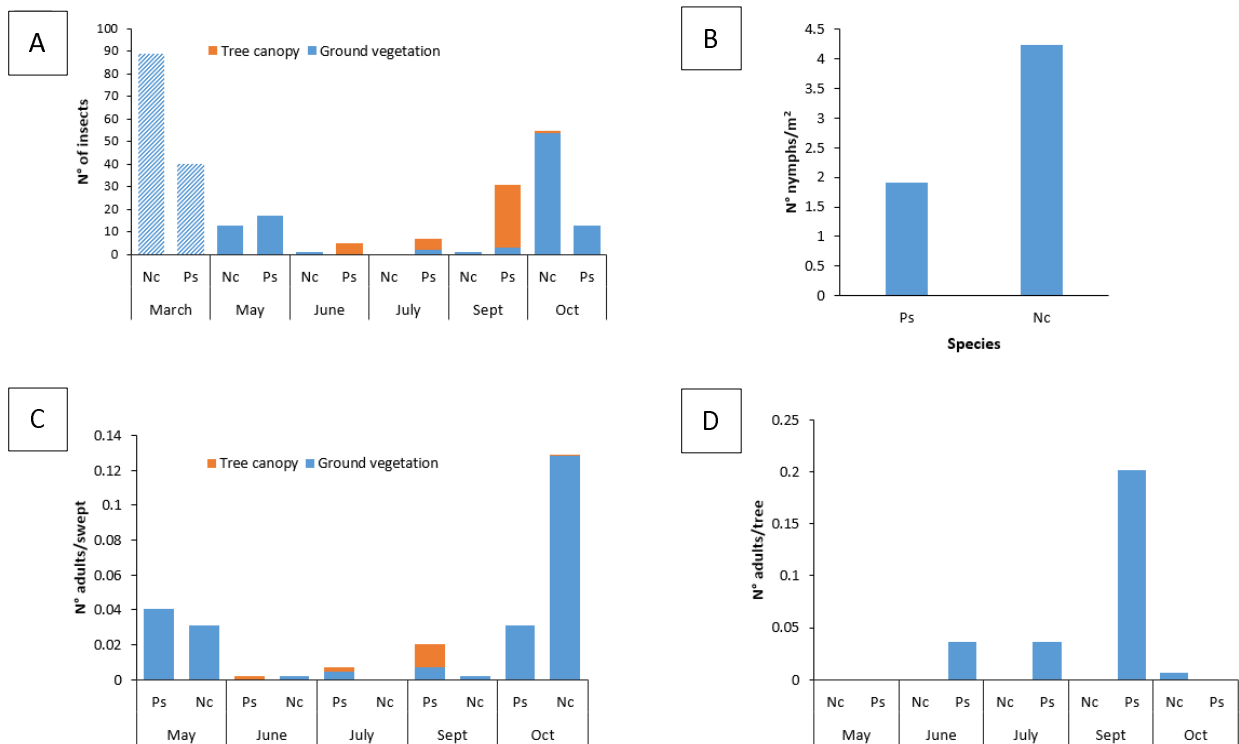

421  
 422 **Figure 7.** *Philaenus spumarius* (Ps) and *Neophilaenus campestris* (Nc) samples in 2018 in the  
 423 100 m-area around the sentinel plantation. **A.** Number of insects sampled through the different  
 424 months. The striped pattern represents the nymphs and the plain pattern represents the adults. **B.**  
 425 Number of nymphs per m sampled in March. **C.** Number of adults per swept sampled through the



426 different months. **D.** Number of adults per tree (wild olive, almond or carob tree) sampled during  
427 the different months.  
428

429 The following years, the amount of insects collected around the plantations varied  
430 between months and years (Fig. 8) with a maximum in October 2020 of 0.06 *P. spumarius*/swept  
431 and 0.13 *N. campestris*/swept, sampled in the ground vegetation for both species. In total, four *P.*  
432 *spumarius* in October 2019, one *P. spumarius* in October 2020 and one *N. campestris* in October  
433 2020 were found in the herbaceous layer of the sentinel plantation, showing that few insects were  
434 also circulating among the trees.

435

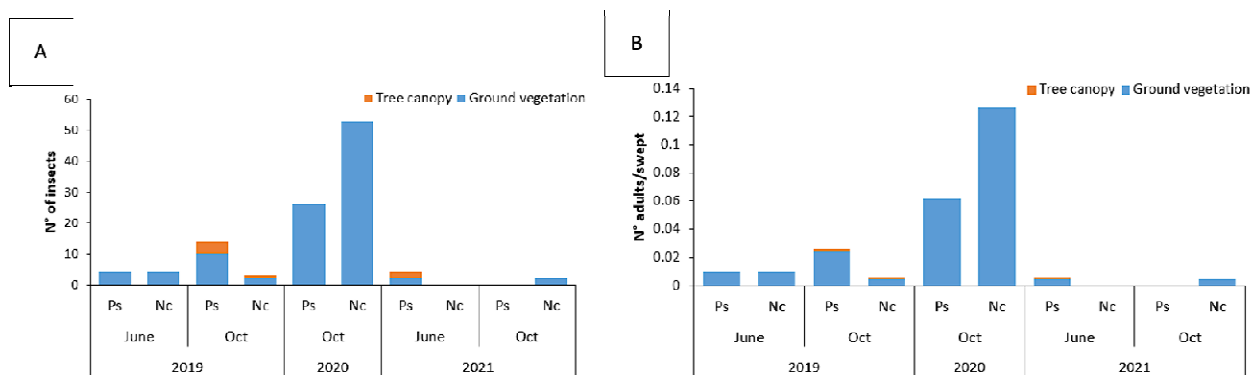

436

437

438 **Figure 8.** *Philaenus spumarius* (Ps) and *Neophilaenus campestris* (Nc) samples in 2019, 2020  
439 and 2021 in the 100 m-area around the sentinel plantation. **A.** The total number of collected adult  
440 insects. **B.** Number of adults per sweep.  
441

442

## 442 The sentinel plants

443 Molecular tests carried out over four years have never detected any bacteria in the  
444 collected samples of the sentinel plants.  
445

446

447 Nevertheless, first symptoms on *S. alba* already started to appear in June of the first year  
448 (2018) with some slight necrosis at the leaf margins of some of the plants. In July of that year, 78  
449 % (21/27 plants) of the willows had slight symptoms, while in October, 96 % (26/27 plants)  
450 presented leaf necrosis starting from the tip, sometimes followed by chlorosis (Fig. 9). Regarding  
451 *P. domestica*, slight chlorosis followed by necrosis at leaf margins started to appear in July 2018  
452 on five of the plants (Fig. 9). In October of the same year, ten plants had slight symptoms and  
two had moderate symptoms of chlorosis and necrosis of leaf margins. Finally, concerning *Q.*

453 *petraea*, first typical necrosis on leaf margins started to appear in September of the first year. In  
454 October, these symptoms were more widespread affecting 30% of the plants (8/27 plants) and  
455 consisted in typical necrosis of leaf margins with a chlorotic halo (Fig. 9), while two plants  
456 completely died. The following years, the same symptoms started to appear on the new growing  
457 leaves, mainly on *S. alba* and *Q. petraea*. On *P. domestica*, typical leaf symptoms were less  
458 frequent; however, this species presented more defoliation. The second year, the extremity of the  
459 principal stem of five plum trees and five willows started to die; for the three species, stem  
460 sprouts started to grow on 1-2 plants per species.

461

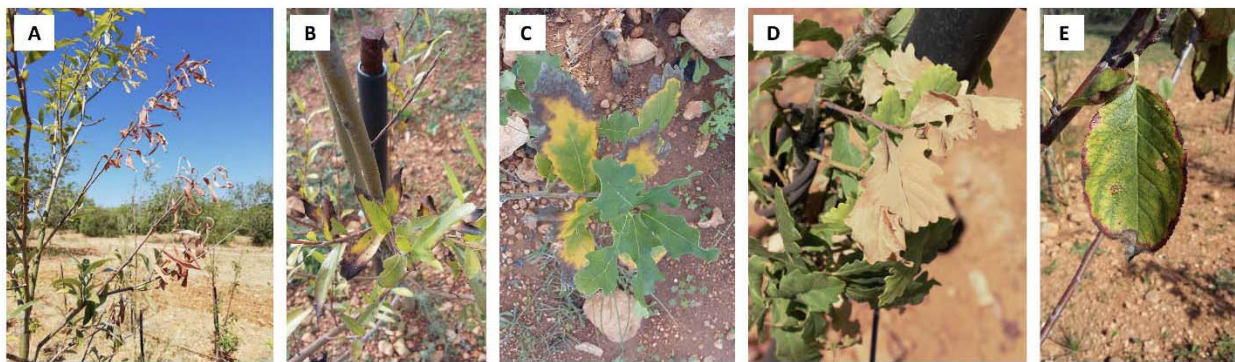

462  
463 **Figure 9.** *Xylella*-like symptoms on the plants of the sentinel plantation in October of different  
464 years. **A.** On *Salix alba* in 2019. **B.** On *Salix alba* in 2018. **C. & D.** On *Quercus petraea* in 2018.  
465 **E.** On *Prunus domestica* in 2018.

466  
467 The summer of 2021 was declared the warmest recorded in Europe in the last 30 years,  
468 with severe heatwaves in the Mediterranean (Copernicus 2022). While the sentinel plants were  
469 already weakened by the last three hot summers despite the irrigation system, many of them died  
470 completely or partially this last year. Death was assigned after scraping the bark from several  
471 parts of the trunk. In total 14 *S. alba* plants were completely dead, and 13 had their main stem  
472 completely desiccated but had developed sprouts at the bottom that were still living. The  
473 remaining leaves showed all symptoms of necrotic and chlorotic leaf margins. Three *Q. petraea*  
474 died and almost every remaining individuals presented symptomatic leaves, while two of them  
475 had their main stem completely dead but with living sprouts. Finally, two *P. domestica* died and  
476 about twenty of them had symptomatic leaves, which consisted of leaves turning red from the  
477 margins with a degraded color, except for some leaves where the discolored margins were quite  
478 delimited. About fifteen plants had between a quarter and a half of their main stem completely  
479 dead starting from the tip. Finally, two of them had their stems completely rejected, leaving a

480 second plant to grow from the variety Myrobolan, as the Opal variety was grafted onto this  
481 rootstock. The size measured each year was not reported here because it was biased by the death,  
482 or partial death, of the main stem.

483  
484 Concerning *Q. petraea*, damage caused by the herbivores *Lachnaia septempunctata* in  
485 May-June 2018 and *Lachnaia sexpunctata* Scopoli, 1763 in June-July 2018 forced us to put their  
486 foliage under a net (Fig. 10) until mid-July to maintain them alive, but this also resulted in their  
487 inaccessibility to *X. fastidiosa* insect vectors. A pesticide (Cypermethrin 10 mL/L) also had to be  
488 applied. The following years, the situation was better and the foliage could be exposed to the  
489 environment all the season. During the monitoring, fungal-like agents were also observed on leaf  
490 surface of many individuals.

491

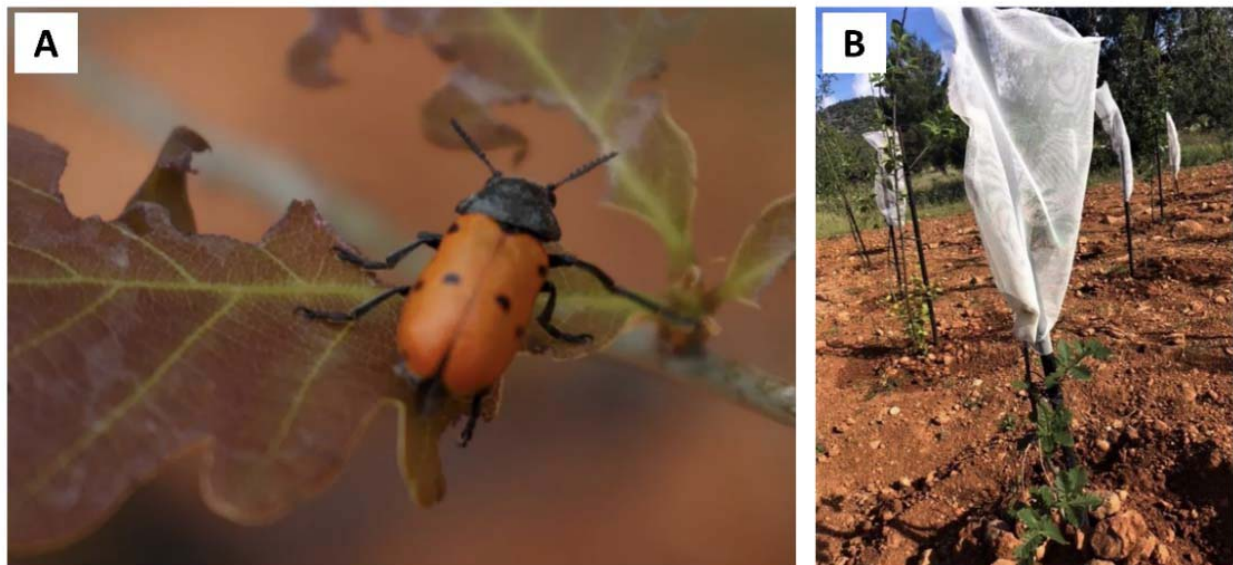

492  
493 **Figure 10.** Herbivore damage on *Quercus petraea*.  
494 **A.** *Lachnaia sexpunctata* feeding on *Q. petraea* in the sentinel plantation. **B.** Net on *Q. petraea* to  
495 protect them against the herbivores.

496

497

## 498 Discussion

499

500 During the four-year sampling and monitoring, *X. fastidiosa* was never detected in our  
501 sentinel plants nor in the collected insects. While, it is rather positive not to have any infection of  
502 this quarantine pathogen, the duration of the plantation establishment did not allow to answer the  
503 question of the potential host range of *X. fastidiosa*. In fact, besides the low infectivity pressure

504 that had been observed on the plot, the absence of detected interaction between the bacterium and  
505 the sentinel plants does not mean that interaction could never occur (Mansfield et al. 2019)  
506 mainly given the highly specific conditions required by this plant pathogen. Instead, this study  
507 was an experimental work to learn how to combine sentinel plantation and research on *X.*  
508 *fastidiosa*, by exploring the constraints that were encountered to improve or redirect the method  
509 for future sentinel projects. In addition, the establishment of this plantation has provided valuable  
510 data on insect abundance and infection rates near the UIB campus, and has enabled the  
511 implementation of other parallel experiments while establishing a lasting international  
512 cooperation between the two universities.

513

### 514 **Complexity of sentinel plantations combined with *X. fastidiosa* research**

515 Despite the publication of EPPO in 2020 providing guidelines for sentinel studies, only  
516 two other assays that describe themselves as sentinel plantations have been reported in the  
517 literature and both as part of the same project (Roques et al. 2015; Vettrano et al. 2015), while a  
518 third study can be characterized as one even if it does not refer as such (Rathé et al. 2014). The  
519 sentinel plantations of Roques et al. (2015) and Vettrano et al. (2015) consisted of a four-year  
520 monitoring of five European tree species, including *Quercus* spp., which had been planted in  
521 China to investigate potential new host-pest/pathogen associations that could emerge in Europe  
522 through plant trade. While the experiments allowed collecting valuable data discovering new  
523 associations, it already highlighted the complexity of the technique in terms of logistics and  
524 workload.

525

526 In our study, many constraints were faced and are reported in Table 2 with some  
527 perspectives on how the system could be improved to ease the implementation of the method.  
528 Our burdens started with permits and Italian administrations. In fact, the initial plan was to  
529 establish the plantation in the Apulian area where the first epidemic was declared. *Ex-patria*  
530 sentinel plantation studies require the movement and planting of non-native plants and they are  
531 therefore subjected to the host country's legislative and administrative procedures for importation  
532 and planting (EPPO 2020). After more than one year of back and forth e-mails to get approval  
533 from the Italian authorities, our request was transferred to our first correspondent. Therefore, the  
534 location of the plantation was changed to Majorca, where a good collaboration with UIB allowed  
535 us to obtain the agreement of the local authorities and the university, where the plantation was to

536 be established, in about a month. A comparative view of the full procedural pathway between our  
537 first attempt in Apulia and Majorca can be viewed in supplementary material (see supplementary  
538 file 1). Also for administrative reasons, Roques et al. (2015) were unable to establish their plot in  
539 the initially optimal climatic zone they wanted to. In their study, many plants were lost due to the  
540 delays in Chinese authorizations and imposed quarantine measures. Due to its common external  
541 border, plants with a European passport can circulate in Europe without restrictions and sentinel  
542 plantation *intra*-Europe should therefore be easier to implement (Vettraino et al. 2020).  
543 Furthermore, Vettraino et al. (2020) classified Europe as having low bureaucratic complexity  
544 concerning sentinel plantations compared to other non-European countries in a ranking they  
545 established according to the country's bureaucratic procedures. Surprisingly, Italy was considered  
546 the least complex European responding country, in contrast to what was experienced here.  
547 However, the current sensitive issue of *X. fastidiosa* in Italy has certainly not helped to speed up  
548 the procedures. On the other hand, the government of the Balearic Islands immediately accepted  
549 our request under certain conditions, which were the compliance with the norms in force in the  
550 territory regarding *X. fastidiosa* and the prohibition of planting *Polygala myrtifolia*, initially  
551 chosen as spy plant for its high susceptibility to the bacterium. Vettraino et al. (2020) reported  
552 that most of the countries have restrictions on the import of certain plant species or genera, e.g.  
553 Roques et al. (2015) were prohibited from planting *Pinus* spp. for their sentinel plantations in  
554 China. Finally, it is worth noting that we were not able to import plants collected in semi-natural  
555 environments, such as cuttings of *S. alba*, because of the difficulty of obtaining phytosanitary  
556 passport for this type of material and all imported plants had to be purchased from Belgian  
557 nurseries in order to be certified.

558  
559 The second challenge of this plantation was to keep the plants alive. The fact they were  
560 grown in an environment with different conditions including temperature and soil, brought  
561 different biotic and abiotic stresses. The life of these plants depended once again on the good  
562 cooperation on site. For example, the delay in the irrigation system establishment in the first year  
563 led the local staff to water the plants by hand every two days, carrying more than 80 L of water in  
564 cans to the plantation. Furthermore, if they had not placed mesh covering the foliage for  
565 herbivores such as *L. septempunctata* that devoured the oak leaves, the plants would have died  
566 during the first year. However, despite constant monitoring by local collaborators, plant mortality  
567 increased from year to year and stress often led, especially in willows, to a death of the main stem

568 and the growth of new shoots at the bottom of the plant. This may have an impact on the outcome  
569 of the experiment, as the death of the potentially contaminated plant parts would lead to the death  
570 of the bacteria itself.

571  
572 Here, the hurdles faced in sentinel plantation assays were coupled with the difficulties  
573 often encountered in *X. fastidiosa* studies. In fact, this bacterium is known to be fastidious for  
574 research including in its detection (Wells et al. 1987). Its concentration in plants and insects could  
575 be below the detection threshold of the different methods (Cruaud et al. 2018; EPPO 2019) and it  
576 is irregularly distributed in plants so may be missed during sampling, especially in asymptomatic  
577 plants (EFSA PLH Panel 2015; EPPO 2019). On the other hand, symptoms are not always  
578 reliable as they can easily be confused with symptoms triggered by other factors such as drought  
579 (EFSA PLH Panel 2015). Therefore, it is more than likely that other causes, such as drought or  
580 soil stress, were responsible for the typical chlorosis and necrosis of the leaf margins observed on  
581 all three species in this study, especially for such plants used to colder temperature and more  
582 humid soil, even with the irrigation provided. While an undetectable low bacterial concentration  
583 can be questioned, several studies reported that high symptomatic responses were correlated with  
584 high bacterial loads (Holland et al. 2014; Saponari et al. 2017) suggesting a greater probability of  
585 detection if symptoms were due to *X. fastidiosa* infection.

586  
587 Another parameter to consider when studying host susceptibility of *X. fastidiosa* is that  
588 the incubation period can be measured over months and years (EFSA PLH Panel 2019b),  
589 indicating that time is a key element. For example, the survival time of Majorcan almond trees  
590 from bacterial infection to tree decline has been estimated around 14 years (Olmo et al. 2021).  
591 Sentinel plantation studies are already by themselves long-term assays, and superimposing the  
592 potential time required for infection of the bacteria gives us an idea of how long it takes to  
593 conduct this type of experiment. However longer incubation period does not necessarily mean  
594 lower susceptibility to the bacterium itself, since many external factors can influence it, for  
595 example the vector population. In fact, as *X. fastidiosa* is an insect vector-borne pathogen, its  
596 circulation and infection will depend from the abundance, host preference and prevalence of its  
597 insect vectors, which is adding complexity to the system compared to other sentinel studies that  
598 would for example measure the direct impact of herbivores on leaves. Moreover, a particularity  
599 of diseases caused by *X. fastidiosa* is the polymorphism of the pathosystems. In fact, different

600 strains and bacterial subspecies will act differently with the various xylem-feeding insect species  
601 and the different host species or cultivars, leading to very specific epidemics around the world  
602 (Pierce's disease, Citrus variegated chlorosis, Olive quick decline...) to almost no symptoms or  
603 to an endophytic presence. While the choice of the region in relation to the strains one wants to  
604 study is essential, this means that an absence or an endophytic interaction does not mean that  
605 other strains cannot be aggressive on the same plant species and cultivar. This means that there  
606 will only be an answer for a potential pathosystem related to the chosen region, but there are  
607 multitudes of other possibilities. The identified pathosystem will keep the adjective "potential"  
608 until the disease is not actually observed in the country of origin, as local environmental  
609 conditions or the presence of an effective vector will also have an impact.

610  
611 A final element to be taken into account in the case of sentinel plantations with *X.*  
612 *fastidiosa* is the European regulation as a quarantine agent (Council Directive 2000/29; EU 2000)  
613 and the European containment and eradication measures imposed in case of detection (Regulation  
614 EU 2020/1201, EU 2020) with the establishment of a demarcated area delimiting an infected  
615 zone of at least 50 m and a buffer zone varying in terms of kilometers depending on the situation.  
616 In the infected zone, eradication measures have to be undertaken consisting of the removal of all  
617 specified host plants of *X. fastidiosa*. However, in areas in which the bacterium is considered  
618 widely established including Apulia, Corsica and Balearic Islands, lighter containment measures  
619 may be implemented as eradication is no longer considered feasible. Nevertheless, these  
620 measures still imply the removal of all the infected plants in the 50 m-zone, and an intensive  
621 surveillance within an area of at least 5 km-radius together with vector control. These measures  
622 mean that even in containment zones such as the Balearic Islands, the detection of an infected  
623 plant in sentinel plantation would lead to a control of vector population in the area, and to a  
624 decrease in the infection pressure around other plants of the plantation. Similarly, if the tested  
625 positive plant has to be removed immediately, the observation of symptom evolution and thus,  
626 the assessment of susceptibility is compromised, unless exceptional permits for scientific  
627 research are obtained. In this study, the problem did not arise because all plants tested negative.  
628 Nevertheless, we were still impacted by the consequences of the European legislation as under  
629 the containment scenario in the Balearics, local government and UIB authorities did not advise  
630 systematic test of the host plants on the campus. In fact, a positive detection would have led to  
631 the uprooting of the campus vegetation, including, as mentioned before, our plantation if special

632 permits were not issued. These measures are considered highly severe for an area where the  
633 bacterium is widespread and separated from other regions by the sea (Olmo et al. 2021). In areas  
634 infected by *X. fastidiosa*, the possibility of not having to remove infected plants in the field for  
635 scientific research purposes deserves further exploration in terms of PRA and bureaucratic  
636 procedure. Finally, for biosafety reasons related to quarantine organisms, plant samples cannot be  
637 moved and have to be processed on site, which again requires a good logistic, local collaboration  
638 and proper infrastructure.

639

#### 640 **Necessity of knowing the epidemiology of the exact sentinel location**

641 The implementation of a sentinel plantation when studying a specific pest or pathogen  
642 requires knowing well the epidemiology of the exact spot of the establishment, as local  
643 environmental components have a great impact on the outcome of the experiment (Kenis et al.  
644 2018). The location chosen for this study was probably not optimal, as it was later evidenced that  
645 *X. fastidiosa* infection pressure was low, and thus, this certainly constitutes the main reason for  
646 the lack of positive detections in insects, spy and sentinel plants in the plot. When the plantation  
647 was established on the UIB campus, the prevalence and the epidemiology of the outbreak on the  
648 island were not yet well known, which is still the case in several regions where *X. fastidiosa* has  
649 recently been detected. Positive detections were reported on the campus about hundred meters  
650 from the plantation on one *R. officinalis* plant and two olive trees (M. A. Miranda personal  
651 communication) and the health state of host plants including declining almond trees, one of the  
652 main crop affected by *X. fastidiosa* on the island, led us to suspect that the place was infected.  
653 However, due to the lack of systematic sampling after the declaration of the contention scenario  
654 in the Balearics, the presence of the bacterium could not be confirmed by testing. In addition, the  
655 quantity of nymphs sampled when choosing the location was 1.9 nymphs/m<sup>2</sup> for *P. spumarius*  
656 and 4.2 nymphs/m<sup>2</sup> for *N. campestris* in March, which is actually higher than the mean observed  
657 in the ground vegetation sampled through the island. López-Mercadal et al. (2021) reported an  
658 average of about 0.22 nymphs/m<sup>2</sup> for *P. spumarius* in the peak of March and 0.005 nymphs/m<sup>2</sup>  
659 for *N. campestris* with differences between plots and years. In our plot, the prevalence of these  
660 nymphs was null. However, this information was not relevant as the infectivity is lost with each  
661 molt (Purcell and Finlay 1979) and prevalence therefore has to be measured on adult insects to  
662 have robust data.

663



664 After deepest outbreak investigations, it appeared that the east side of the island towards  
665 Manacor was probably the most infected part. In fact, Gutiérrez Hernández and García (2018)  
666 mapped the positive records of *X. fastidiosa* detected in the Balearics by the Plant Health Section  
667 of the Department of Environment, Agriculture and Fisheries of the Government of the Balearic  
668 Islands, and showed that most of the positive samples were concentrated on the east side  
669 (Manacor, Sant Llorenç des Cardassar and Son Servera; Fig. 11) with the highest densities in  
670 agricultural and residential areas close to the main communication routes. They stressed,  
671 however, that the conducted sampling strategy could have biased this distribution, for instance,  
672 because the samples could have been collected preferentially in these more accessible areas.  
673 Based on direct field observations and using Google street view, Moralejo et al. (2020) also  
674 mapped the distribution of *Xylella*-symptomatic almond orchards and their mortality across the  
675 island, tracking their evolution since 2012 (Fig. 11). They showed a gradient from east to west,  
676 showing a moderate incidence on the site of the plantation. However, molecular testing of  
677 infected almond trees did not reveal a clear spatial pattern (Moralejo et al. 2020). In addition,  
678 highly variable incidence was encountered in different orchards (Olmo et al. 2021), hence the  
679 need of knowing the incidence and prevalence of vectors at the precise location of a sentinel  
680 plantation.

681  
682 The density and prevalence of insect vectors are one of the drivers of *X. fastidiosa*  
683 infection and impact the temporal dynamics of symptom appearance (EFSA PLH Panel 2019b),  
684 as multiple and independent infections could lead to an injection of a higher bacterial load and a  
685 decrease in the incubation period (Daugherty and Almeida 2009). The damage in the Balearics  
686 are the consequence of almost 20 years of infection (Moralejo et al. 2020), suggesting that the  
687 infection pressure could be too low to conduct sentinel plantation experiments. In fact, the  
688 abundance of nymphs and sampled adults as well as the prevalence of insects are lower than the  
689 values encountered in the infected areas of Apulia where the outbreak was more drastic. A  
690 prevalence of 23% was reported in Majorca (López-Mercadal et al. 2021) compared to up to 71%  
691 detected in an Apulian olive grove (Cornara et al. 2016a). Similarly, higher densities of vectors  
692 were measured in Apulia with 7 to 39 nymphs of *P. spumarius*/m<sup>2</sup> in olive orchards (Bodino et al.  
693 2019), about 7 adults/olive trees and 0.5 adults/swept in weeds recorded during the respective  
694 seasonal peaks (Cornara et al. 2016b), however, with heterogeneity identified among the orchards  
695 studied (Bodino et al. 2019). In our plot, the adult density varied according to the seasonal

696 estivation and ground drying pattern of Mediterranean regions (Cornara et al. 2016b; López-  
697 Mercadal et al. 2021). It barely reached a maximum of 0.04 *P. spumarius*/swept in May and 0.2  
698 *P. spumarius*/tree in September 2018, while the average reported through the island was below  
699 0.1 adults/swept in ground cover, tree canopy and border vegetation (López-Mercadal et al.  
700 2021). In addition, *N. campestris* was not considered as a significant vector due to its very low  
701 presence on the tree canopy (Lopez-Mercadal et al. 2021). Moreover, the soil around the  
702 plantation was plowed almost every year, as common management on the island, which besides  
703 destroying several rosemary spy plants, probably decreased insect movement around the plot  
704 even with sowing of ground vegetation the second year. In fact, tillage is a technique of vector  
705 control reducing the number of vector/m<sup>2</sup> (Bodino et al. 2019; EFSA PLH Panel 2019b). In the  
706 study of Kenis et al. (2018), their plantation located at the edge of the forest took less time to be  
707 infested than another one situated in an agricultural-peri-urban area, highlighting again the impact  
708 of high local circulation of pests and pathogens on the time and outcome of the assay.

709

#### 710 **Sentinel plantations as an efficient tool for *X. fastidiosa* research in specific situations**

711 Even in locations with high infection pressure, the efficiency of the sentinel plantation in  
712 the case of *X. fastidiosa* host range investigation is questioned due to the ratio results/time-  
713 workload. Yet the sentinel plantation method is currently being used in Apulia for the screening  
714 of olive cultivars coming from various Mediterranean olive-growing areas (Spain, Tunisia,  
715 Greece, etc.) by exposing them to the natural pressure of inoculum in heavily infected field (XF-  
716 ACTORS 2017; Saponari, et al. 2019). The previous finding of the mild symptoms on the  
717 Leccino and FS17<sup>®</sup> olive cultivars adjacent to severely affected orchards, motivated the study  
718 (Boscia et al. 2017). Approximately 100 different genotypes were planted and are currently under  
719 evaluation in different plots, actually making the Apulian region home to one of the largest  
720 sentinel plantation of all time. This study is promising and is considered necessary for long-term  
721 management of *X. fastidiosa* in olive growing regions as preliminary data show already  
722 differences in susceptibility in various cultivars (EFSA PLH Panel 2019b; Saponari et al. 2019).  
723 However, it highlights the long-term commitment required as the survey started in 2015 and is  
724 still ongoing. The project is part of a research program funded by the European Union's Horizon  
725 2020 Research and Innovation Program, which explains how a project of this magnitude could be  
726 established and which underlines the need for long-term consistent international support for the  
727 implementation of such experiments. The success of this plantation, in addition to the selection of

728 highly infected plots, also comes from the fact that the tested potential hosts are related to the STs  
729 present in the environment. The Apulian ST53 being highly aggressive on olives, it is obvious to  
730 carry out olive plant susceptibility in this area. However, other *X. fastidiosa* infected regions as  
731 Balearic Islands and Corsica could be interesting to study the susceptibility to other STs, as three  
732 STs belonging to two subspecies coexist in Majorca while only one in the Apulian region.

733  
734 Thus, the Apulia study proved the usefulness of sentinel plantations in the context of *X.*  
735 *fastidiosa*. However, it would be less relevant to conduct these studies in certain situations. There  
736 should be, for example, similarities between the climatic conditions of the two regions involved  
737 in the sentinel studies to minimize the impact of external factors. So far, the bacterium has only  
738 been found established in southern Europe, in regions with a Mediterranean type of climate, and  
739 these studies would therefore be less suitable for northern European countries, as differences in  
740 environmental conditions could lead to weakening or even death of the plants and to  
741 misidentification of the cause of potential symptoms. Nevertheless, this tool remains very  
742 valuable and should be considered for studies on *X. fastidiosa*, as other techniques for screening  
743 potential hosts of this pathogen are also discussed. Among these techniques, mechanical  
744 inoculation shows a low rate of success, even in susceptible hosts (Prado et al. 2008; EFSA PLH  
745 Panel 2019b) as this method artificially reproduce infection while in the environment, only  
746 xylem-specialized insect vectors have the capacity to infect plants (Almeida et al. 2005).  
747 Working with insect vectors is therefore a more relevant way of conducting experiments.  
748 However, besides the biosafety risk it could represent for *Xylella*-free regions and the need for  
749 proper infrastructure, the very act of infecting an insect is a challenge. Other experiments  
750 consisting in grafting more than 400 olive genotypes on infected trees were conducted in parallel  
751 of sentinel plantation in Apulia to short incubation period and time imposed by insect traits  
752 (Saponari et al. 2019). However, in addition to also being an artificial way of infection, it requires  
753 the availability of appropriate infected graft material. Therefore, sentinel plantation has its  
754 advantages and has to be considered a valuable complementary tool in certain situations.

755  
756 In these situations, this study has provided a complete methodology to monitor the  
757 bacterium circulation through the sentinel plants. The use of spy plants is certainly useful if  
758 sampling of susceptible vegetation is not possible in the nearby area. In other cases, sampling of  
759 local flora may be sufficient, although it does not ensure real-time circulation of the bacteria, as

760 the current state of the local flora could be the result of infection from the past (Moralejo et al.  
761 2020). The use of small perennial plants may facilitate sampling, as bacteria are distributed  
762 irregularly in the plant. The species or mix of species must be adapted to local conditions,  
763 susceptible to the bacterial strains being investigated and favored by local vectors. In this study,  
764 *R. officinalis* was chosen as it was reported infected with the European STs of subsp. *multiplex*  
765 and subsp. *pauca* (ST6, ST7, ST53, ST80, ST81 and ST87) and was found infected in Majorca  
766 with the ST81 (EFSA 2022). In addition, in America, the bacterium was detected on this plant  
767 species close to *X. fastidiosa* subsp. *fastidiosa*-infected vines (Freitag 1951).

768

### 769 **Conducting sentinel studies differently to assess host range up North**

770 Sentinel studies can also be carried out differently to study host range in countries that  
771 cannot match closely the environmental conditions of the potential location. First, arboreta and  
772 botanical gardens are still an option of studying exotic host range in naturally infected  
773 environments. However, as a detectable infection depends on the density and prevalence of *X.*  
774 *fastidiosa* insect vectors (Daugherty and Almeida 2009), the use of this method could also be  
775 discussed as these areas are often subjected to phytosanitary management. One advantage of  
776 these studies regarding *X. fastidiosa* would be that plants are grown in these sites for a long time,  
777 increasing the success concerning potential latent periods or low bacterial load potentially  
778 enabling detection. In addition, the study of Groenteman et al. (2015) has shown promising  
779 results for *X. fastidiosa* research by sampling in botanical gardens. They managed to discover 28  
780 New Zealander plant species infected by *X. fastidiosa*, including several visited by the insect  
781 vector *Homalodisca vitripennis* Germar, 1821, in Californian botanical gardens where the disease  
782 is well established. They also found parasites capable of controlling the vector on these plant  
783 species in the aim of a biocontrol early-response strategy in case *H. vitripennis* invade New-  
784 Zealand.

785

786 A second way would be to carry out transmission experiments with naturally infected  
787 vectors in contaminated regions to bypass the problems of biosecurity imposed by *Xylella*-free  
788 areas and the difficulty of infecting insects. Compared to standard sentinel plantations, these  
789 experiments allow to reduce the dependence on vector density and on insect feeding preferences.  
790 In fact, although *P. spumarius* is considered a polyphagous species and was observed feeding on  
791 the three studied sentinel plants in their area of distribution, it is possible that in the sentinel

792 country, these insects are more interested in native vegetation. Native plants could therefore  
793 compete with the exotic sentinel ones, potentially resulting in fewer vector feeding events  
794 decreasing the bacterial transmission probability. Even if vector preferences are biased and that  
795 natural conditions are therefore not fully met, these experiments can still be considered as  
796 sentinel studies since they consist in *ex-patria* plants sent to study the impact of exotic organisms  
797 in areas in which they occur. This has been done in Majorca as a complementary experiment  
798 where 20 new cuttings of *S. alba* and of *P. tremula* have been sent from Belgium to the UIB  
799 campus (Casarin et al. submitted). There, transmission experiments with naturally infected *P.*  
800 *spumarius* were conducted in an insect-proof greenhouse and revealed positive infection on *S.*  
801 *alba*, proving the higher efficiency of the technique compared to sentinel plantation.

802  
803 Finally, sentinel plantings “*in-patria*” (Eschen et al. 2019; or “sentinel nurseries”, sensu  
804 Vettraino et al. 2017) consist in planting native traded plants without phytosanitary treatments on  
805 its own land to monitor pests and pathogens which could be spread through international trade  
806 (Vettraino et al. 2017). They obviously do not have the same objective as *ex-patria* plantation  
807 that informs PRA of organisms that are not yet present in a given area. Rather, they consist of  
808 surveillance for a known pathogen for which possible entry and dispersal pathways have been  
809 identified (Mansfield et al. 2019) and they still represent valuable sentinel assays to be conducted  
810 in the aim of early detection of *X. fastidiosa* in new regions. The major difference with a standard  
811 commercial nursery is that no pest control measures are implemented on these plants (EPPO  
812 2020) so that it is possible for the vectors to reach the plants and for the plants to get infected if  
813 *X. fastidiosa* is introduced in the area. For this strategy to be effective, these plantations have to  
814 be established in strategic locations where the bacterium is the most likely to enter. The “plant for  
815 planting” pathway being the main entrance for exotic organisms including *X. fastidiosa* (Liebhold  
816 et al. 2012; EFSA PLH Panel 2018), their locations in/close to nurseries or other plant  
817 commercial places would be relevant. In addition, these plantations must consist of known host  
818 plants that have a high probability to be the first infected when the bacterium enters an area and if  
819 possible, to be highly susceptible for the infection to be visible and easily detectable. For  
820 example, the Auckland Botanic Garden had set up a sentinel plot of myrtle plants to detect the  
821 potential arrival of the myrtle rust (*Puccinia psidii* Winter, 1884) as early as possible in New  
822 Zealand, as the fungus was prevalent in Australia at the time (Barham et al. 2015). Similarly, one  
823 can imagine planting a network of *P. myrtifolia* near nurseries, previously tested for innocuity,

824 which are regularly monitored for potential contamination by *X. fastidiosa*. Obviously, these  
825 susceptible plants should be tested carefully and regularly to provide the benefits of early  
826 detection while preventing them from serving as inoculum for disease establishment (Mansfield  
827 et al. 2019).

828

829

830 **Table 2.** Constraints and perspective of using sentinel plantation for *Xylella*-research. Constraints  
 831 encountered in establishing a sentinel plantation in the case of a *Xylella fastidiosa* survey and  
 832 perspectives for improving the implementation of the method.

| Constraints                                                                                                                                                                                                     | Perspectives                                                                                                                                                                                                                                                                                                                                                                                                                                                |
|-----------------------------------------------------------------------------------------------------------------------------------------------------------------------------------------------------------------|-------------------------------------------------------------------------------------------------------------------------------------------------------------------------------------------------------------------------------------------------------------------------------------------------------------------------------------------------------------------------------------------------------------------------------------------------------------|
| <b>Administrations</b>                                                                                                                                                                                          |                                                                                                                                                                                                                                                                                                                                                                                                                                                             |
| - Administrative procedures: Apulia vs. Majorca.<br>Probably impacted by the sensitive issue of <i>X. fastidiosa</i> .                                                                                          | - Need for strong, organized and well-informed partnership.<br>- Despite EPPO guidelines (2020), need for more homogenization of admin. procedures and interpretation of the regulations at European level (and at global level through other intercontinental organization/conventions), requiring to improve consideration towards sentinel plantations by increasing awareness of their usefulness.                                                      |
| <b>Legal frame of importing exotic plant material</b>                                                                                                                                                           |                                                                                                                                                                                                                                                                                                                                                                                                                                                             |
| - Complexity of obtaining a European passport for material collected in semi-natural environments.                                                                                                              | - Need to simplify the procedures at national level for obtaining passports for scientific research purposes, under verification conditions of the plant material innocuity.                                                                                                                                                                                                                                                                                |
| <b>Legal frame of <i>X. fastidiosa</i>, as a quarantine agent</b>                                                                                                                                               |                                                                                                                                                                                                                                                                                                                                                                                                                                                             |
| - No movement of plant material from infected zones.                                                                                                                                                            | - Need for a proper bio-molecular processing infrastructure on site.                                                                                                                                                                                                                                                                                                                                                                                        |
| - Removal of infected plants and vector control, decreasing infection pressure around the plantation.                                                                                                           | - Choosing a containment site, and not an eradication site.<br>- Need for further PRA exploration if special permits could be obtain for not uprooting infected flora for scientist research purpose or for maintaining plants under certain conditions, e.g. by placing an insect-proof net on the plants to prevent spread by vectors.                                                                                                                    |
| - Routing tests of local host plants not advised.                                                                                                                                                               | - Plantation of own susceptible spy plant network.                                                                                                                                                                                                                                                                                                                                                                                                          |
| - Restrictions of planting specific plant species ( <i>Polygala myrtifolia</i> ).                                                                                                                               | - / (or obtaining special permits for research purpose after PRA exploration. Need to verify plant innocuity and to sample them regularly to remove them as soon as possible in case of infection to prevent participating to the spread of the disease locally).                                                                                                                                                                                           |
| <b>Complexity to detect <i>X. fastidiosa</i></b>                                                                                                                                                                |                                                                                                                                                                                                                                                                                                                                                                                                                                                             |
| - Concentration below threshold of methods.                                                                                                                                                                     | - Need to use several specific and sensitive detection methods (quantitative PCR, nested PCR...).                                                                                                                                                                                                                                                                                                                                                           |
| - Irregular distribution in plants and asymptomatic plants.                                                                                                                                                     | - Multiply sampling from all sides of the plant (leaves and twigs). If symptoms, prioritizing sampling of symptomatic parts.                                                                                                                                                                                                                                                                                                                                |
| - Symptoms easily confused with ones due to other causes.                                                                                                                                                       | - Validation of bacterial presence only if detected with two different methods.                                                                                                                                                                                                                                                                                                                                                                             |
| <b>Length of establishment</b>                                                                                                                                                                                  |                                                                                                                                                                                                                                                                                                                                                                                                                                                             |
| - Incubation period and length of establishment of <i>X. fastidiosa</i> .                                                                                                                                       | - Long-term international financial and workload support.<br>- Considering arboreta and botanical gardens studies.                                                                                                                                                                                                                                                                                                                                          |
| - Plants submitted to the unpredictability of natural conditions, with high dependence on abundance, host preference and prevalence of <i>X. fastidiosa</i> insect vectors.                                     | - Knowing the epidemiology of the exact sentinel location and choose a plot with high infective pressure (insect prevalence on site is measured on adults).<br>- Considering targeted transmission experiments on sentinel plants with wild insects collected from naturally infected areas.                                                                                                                                                                |
| <b>Pathosystem polymorphism</b>                                                                                                                                                                                 |                                                                                                                                                                                                                                                                                                                                                                                                                                                             |
| - Investigation only of potential pathosystems based on local components.<br>For Majorca, strains: ST1, ST81, ST7; insect vectors: <i>P. spumarius</i> or <i>N. philaenus</i> ; local environmental conditions. | - Choosing location according to the strains one wants to test (extrapolating on current knowledge on which bacterial subspecies affect which plant genus can help but it is not always accurate).<br>- If no preferential subspecies, choosing location with the most strains present, or multiply experiments to several areas.<br>- Choosing location with the closest conditions to country of origin (environmental or insect vector population type). |
| <b>Abiotic and biotic stress for plants</b>                                                                                                                                                                     |                                                                                                                                                                                                                                                                                                                                                                                                                                                             |
| - Other symptoms masking those of interest                                                                                                                                                                      | - Irrigation system, eventual fertilizer application.                                                                                                                                                                                                                                                                                                                                                                                                       |
| - Plant mortality limiting the experiment                                                                                                                                                                       | - Fitting environmental conditions of native area if possible (in case of northern European countries more complicate with <i>X. fastidiosa</i> only occurring in southern Europe, thus, considering arboreta and botanical garden studies or targeted transmission experiments in infected areas).                                                                                                                                                         |

833

## 834 **Conclusion**

835

836 In conclusion, this study is an experimental work highlighting that sentinel plantations are  
837 not easy to implement in the case of *X. fastidiosa*, but that they are complementary to other  
838 studies and that they could provide valuable information on host interactions when some  
839 conditions are met. This work proposes a methodology to monitor future sentinel plantations and  
840 it suggests other ways of conducting sentinel experiments for screening host range or for early  
841 detection of *X. fastidiosa* in new areas.

842

843

## 844 **Acknowledgments**

845 We would like to acknowledge all the people who helped in the establishment of the sentinel  
846 plantation and the irrigation system, and who contributed to maintain the plants alive, especially  
847 the UIB gardeners and technicians, Amélie Emond, Maria Antònia Tugores, Pau Mercadal,  
848 Carlos Barceló and Noelia Barros. We also want to thank all the people who irrigated manually  
849 with bravery the plantation during the first year. We are thankful to Sofia Delgado and Claudia  
850 Paredes for their laboratory support. Finally, we are grateful to UIB authorities and to the  
851 government of the Balearic Islands for the authorization to carry out these assays.

852

## 853 **Author contributions**

854 All authors designed the sentinel plantation assay. JLM and MAA took care of the plantation  
855 during the four years. NC and SH carried out the detection tests. The first author wrote the first  
856 draft of the manuscript and the last author provided the comparative view of administrative  
857 procedures in supplementary file 1. All authors commented, improved previous versions of the  
858 manuscript, and read and approved the final version.

859

## 860 **Funding**

861 The research that yielded these results, was funded by the Belgian Federal Public Service of  
862 Health, Food Chain Safety and Environment through the contracts RF 19/6331 (XFAST project)  
863 and RT/7 XYLERIS 1 (XYLERIS project). NC was supported by the Foundation for Training in



864 Industrial and Agricultural Research (FRIA, FNRS), and SH by the Belgian Federal Public  
865 Service of Health, Food Chain Safety and Environment.

866

## 867 **Competing interests**

868 The authors have declared that no competing interests exist.

869

870

## 871 **References**

872

873 Akbulut S and Stamps WT (2012) Insect vectors of the pinewood nematode: a review of the  
874 biology and ecology of *Monochamus* species. *Forest Pathology*, 42(2), 89–99.  
875 <https://doi.org/10.1111/J.1439-0329.2011.00733.X>

876

877 Almeida RPP, Blua, MJ, Lopes, JRS, Purcell AH (2005) Vector transmission of *Xylella*  
878 *fastidiosa*: Applying fundamental knowledge to generate disease management strategies.  
879 *Annals of the Entomological Society of America*, 98(6), 775–786.  
880 [https://doi.org/10.1603/0013-8746\(2005\)098\[0775:VTOXFA\]2.0.CO;2](https://doi.org/10.1603/0013-8746(2005)098[0775:VTOXFA]2.0.CO;2)

881

882 Aukema JE, Leung B, Kovacs K, Chivers C, Britton KO (2011) Economic impacts of non-native  
883 forest insects in the continental United States. *PLoS ONE*, 6(9), 24587.  
884 <https://doi.org/10.1371/journal.pone.0024587>

885

886 Barham E, Sharrock S, Lane C, Baker R (2016) The International Plant Sentinel Network: A tool  
887 for regional and national plant protection organizations. *EPPO Bulletin*, 46(1), 156–162.  
888 <https://doi.org/10.1111/epp.12283>

889

890 Blossey B and Notzold R (1995) Evolution of increased competitive ability in invasive  
891 nonindigenous plants: A hypothesis. *The Journal of Ecology*, 83(5), 887.  
892 <https://doi.org/10.2307/2261425>

893

894 Bodino N, Cavalieri V, Dongiovanni C, Plazio E, Saladini MA, Volani S, Simonetto A, Fumarola  
895 G, Di Carolo M, Porcelli, F, Gilioli G, Bosco D (2019) Phenology, seasonal abundance  
896 and stage-structure of spittlebug (Hemiptera: Aphrophoridae) populations in olive groves  
897 in Italy. *Scientific Reports* 2019 9:1, 9(1), 1–17. <https://doi.org/10.1038/s41598-019-54279-8>

898

899  
900 Boscia D, Altamura G, Ciniero A, Di Carolo M, Dongiovanni C, Fumarola G, Giampetruzzi A,  
901 Greco P, La Notte P, Loconsole G, Manni F, Melcarne G, Montilon V, Morelli M,  
902 Murrone N, Palmisano F, Pollastro P, Potere O, Roseti V, ... Martelli GP (2017)  
903 Resistenza a *Xylella fastidiosa* in diverse cultivar di olivo. *L' Informatore Agrario*, 11.  
904 <https://doi.org/10.5281/ZENODO.495708>

905

- 906 Bosso L, Di Febbraro M, Cristinzio G, Zoina A, Russo D (2016) Shedding light on the effects of  
907 climate change on the potential distribution of *Xylella fastidiosa* in the Mediterranean  
908 basin. *Biological Invasions*, 18(6), 1759–1768. [https://doi.org/10.1007/S10530-016-1118-](https://doi.org/10.1007/S10530-016-1118-1/FIGURES/4)  
909 [1/FIGURES/4](https://doi.org/10.1007/S10530-016-1118-1/FIGURES/4)
- 910
- 911 Brasier CM (2008) The biosecurity threat to the UK and global environment from international  
912 trade in plants. *Plant Pathology*, 57(5), 792–808. [https://doi.org/10.1111/J.1365-](https://doi.org/10.1111/J.1365-3059.2008.01886.X)  
913 [3059.2008.01886.X](https://doi.org/10.1111/J.1365-3059.2008.01886.X)
- 914
- 915 Brasier CM and Buck KW (2001) Rapid evolutionary changes in a globally invading fungal  
916 pathogen (Dutch elm disease). *Biological Invasions*, 3(3), 223–233.  
917 <https://doi.org/10.1023/A:1015248819864> 924
- 918
- 919 Britton KO, White P, Kramer A, Hudler G (2010) A new approach to stopping the spread of  
920 invasive insects and pathogens: early detection and rapid response via a global network of  
921 sentinel plantings. *New Zealand Journal of Forestry Science*, 40, 109–114.  
922 [http://www.scopus.com/inward/record.url?eid=2-s2.0-](http://www.scopus.com/inward/record.url?eid=2-s2.0-77955440077&partnerID=tZOtx3y1)  
923 [77955440077&partnerID=tZOtx3y1](http://www.scopus.com/inward/record.url?eid=2-s2.0-77955440077&partnerID=tZOtx3y1)
- 924
- 925 Chatterjee S, Almeida RPP and Lindow S (2008) Living in two worlds: The plant and insect  
926 lifestyles of *Xylella fastidiosa*. *Annual Review of Phytopathology*, 46(1), 243–271.  
927 <https://doi.org/10.1146/annurev.phyto.45.062806.094342>
- 928
- 929 Colautti RI, Ricciardi A, Grigorovich IA, MacIsaac HJ (2004) Is invasion success explained by  
930 the enemy release hypothesis? *Ecology Letters*, 7(8), 721–733.  
931 <https://doi.org/10.1111/J.1461-0248.2004.00616.X>
- 932
- 933 Copernicus (2022) Copernicus: Globally, the seven hottest years on record were the last seven;  
934 carbon dioxide and methane concentrations continue to rise | Copernicus.  
935 [https://climate.copernicus.eu/copernicus-globally-seven-hottest-years-record-were-last](https://climate.copernicus.eu/copernicus-globally-seven-hottest-years-record-were-last-seven)  
936 [seven](https://climate.copernicus.eu/copernicus-globally-seven-hottest-years-record-were-last-seven) [Accessed on 10.06.2022]
- 937
- 938 Cornara D, Cavalieri V, Dongiovanni C, Altamura G, Palmisano F, Bosco D, Porcelli F, Almeida  
939 RPP, Saponari M (2016a) Transmission of *Xylella fastidiosa* by naturally infected  
940 *Philaenus spumarius* (Hemiptera, Aphrophoridae) to different host plants. *Journal of*  
941 *Applied Entomology*, 141(1–2), 80–87. <https://doi.org/10.1111/jen.12365>
- 942
- 943 Cornara D, Saponari M, Zeilinger AR, de Stradis A, Boscia D, Loconsole G, Bosco D, Martelli  
944 GP, Almeida RPP, Porcelli F (2016b) Spittlebugs as vectors of *Xylella fastidiosa* in olive  
945 orchards in Italy. *Journal of Pest Science*, 90(2), 521–530.  
946 <https://doi.org/10.1007/S10340-016-0793-0/TABLES/3>
- 947
- 948 Cruaud A, Gonzalez AA, Godefroid M, Nidelet S, Streito JC, Thuillier JM, Rossi JP, Santoni S,  
949 Rasplus JY (2018) Using insects to detect, monitor and predict the distribution of *Xylella*  
950 *fastidiosa*: a case study in Corsica. *Scientific Reports* 2018 8:1, 8(1), 1–13.  
951 <https://doi.org/10.1038/s41598-018-33957-z>
- 952

- 953 Cuntly A, Legendre B, de Jerphanion P, Dousset C, Forveille A, Paillard S, Olivier V (2022)  
954 Update of the *Xylella fastidiosa* outbreak in France: two new variants detected and a new  
955 region affected. *European Journal of Plant Pathology*, 1–6. 961  
956 <https://doi.org/10.1007/S10658-022-02492-Z/FIGURES/2>  
957
- 958 Daugherty MP and Almeida RPP (2009) Estimating *Xylella fastidiosa* transmission parameters:  
959 decoupling sharpshooter number and feeding period. *Entomologia Experimentalis et*  
960 *Applicata*, 132(1), 84–92. <https://doi.org/10.1111/J.1570-7458.2009.00868.X>  
961
- 962 Denancé N, Legendre B, Briand M, Olivier V, de Boisseson C, Poliakoff F, Jacques MA (2017)  
963 Several subspecies and sequence types are associated with the emergence of *Xylella*  
964 *fastidiosa* in natural settings in France. *Plant Pathology*, 66(7), 1054–1064.  
965 <https://doi.org/10.1111/ppa.12695>  
966
- 967 Diagne C, Leroy B, Vaissière AC, Gozlan RE, Roiz D, Jarić I, Salles JM, Bradshaw CJA,  
968 Courchamp F (2021) High and rising economic costs of biological invasions worldwide.  
969 *Nature* 2021 592:7855, 592(7855), 571–576. <https://doi.org/10.1038/s41586-021-03405-6>  
970
- 971 EC (European Commission) (2000) Council Directive 2000/29/EC of 8 May 2000 on protective  
972 measures against the introduction into the Community of organisms harmful to plants or  
973 plant products and against their spread within the Community. *Official Journal of the*  
974 *European Communities*, 169, 1–112. <http://data.europa.eu/eli/dir/2000/29/oj>  
975
- 976 EC (European Commission) (2020) Commission Implementing Regulation (EU) 2020/1201 of 14  
977 August 2020 as regards measures to prevent the introduction into and the spread within  
978 the Union of *Xylella fastidiosa* (Wells et al.). *Official Journal of the European Union*.  
979 [http://data.europa.eu/eli/reg\\_impl/2020/1201/oj](http://data.europa.eu/eli/reg_impl/2020/1201/oj) 985  
980
- 981 EFSA (European Food Safety Authority) (2021) Pest survey card on *Xylella fastidiosa*. EFSA  
982 Supporting Publications, 16(6). <https://doi.org/10.2903/SP.EFSA.2019.EN-1667>  
983
- 984 EFSA (European Food Safety Authority) (2022) Update of the *Xylella* spp. host plant database –  
985 systematic literature search up to 30 June 2021. *EFSA Journal*, 20(1).  
986 <https://doi.org/10.2903/J.EFSA.2022.7039>  
987
- 988 EFSA PLH Panel (EFSA Panel on Plant Health) (2015) Scientific Opinion on the risks to plant  
989 health posed by *Xylella fastidiosa* in the EU territory, with the identification and  
990 evaluation of risk reduction options. *EFSA Journal*, 13(1), 3989.  
991 <https://doi.org/10.2903/j.efsa.2015.3989>  
992
- 993 EFSA PLH Panel (EFSA Panel on Plant Health) (2016) Four statements questioning the EU  
994 control strategy against *Xylella fastidiosa*. *EFSA Journal*, 14(3).  
995 <https://doi.org/10.2903/j.efsa.2016.4450>  
996
- 997 EFSA PLH Panel (EFSA Panel on Plant Health) (2018) Updated pest categorisation of *Xylella*  
998 *fastidiosa*. *EFSA Journal*, 16(7). <https://doi.org/10.2903/j.efsa.2018.5357>  
999

- 1000 EFSA PLH Panel (EFSA Panel on Plant Health) (2019a) Effectiveness of in planta control  
1001 measures for *Xylella fastidiosa*. EFSA Journal, 17(5), e05666.  
1002 <https://doi.org/10.2903/J.EFSA.2019.5666>  
1003
- 1004 EFSA PLH Panel (EFSA Panel on Plant Health) (2019b) Update of the Scientific Opinion on the  
1005 risks to plant health posed by *Xylella fastidiosa* in the EU territory. EFSA Journal, 17(5).  
1006 <https://doi.org/10.2903/j.efsa.2019.5665>  
1007
- 1008 EPPO (European and Mediterranean Plant Protection) (2020) PM 3/91(1) Sentinel woody plants:  
1009 concepts and application. EPPO Bulletin, 50(3), 429–436.  
1010 <https://doi.org/10.1111/EPP.12698>  
1011
- 1012 EPPO (European and Mediterranean Plant Protection Organization) (2019) PM 7/24 (4) *Xylella*  
1013 *fastidiosa*. EPPO Bulletin, 49(2), 175–227. <https://doi.org/10.1111/EPP.12575>  
1014
- 1015 Eschen R, O’Hanlon R, Santini A, Vannini A, Roques A, Kirichenko N, Kenis M (2019)  
1016 Safeguarding global plant health: the rise of sentinels. Journal of Pest Science, 92(1), 29–  
1017 36. <https://doi.org/10.1007/s10340-018-1041-6>  
1018
- 1019 EUROPHYT Online (2022) The European Union Notification System for Plant Health  
1020 Interceptions.  
1021 [https://ec.europa.eu/food/plant/plant\\_health\\_biosecurity/europhyt/interceptions\\_en](https://ec.europa.eu/food/plant/plant_health_biosecurity/europhyt/interceptions_en)  
1022 [Accessed on 24.04.2022]  
1023
- 1024 Freitag JH (1951) Host range of the Pierce’s disease virus of Grapes as determined by insect  
1025 transmission. Phytopathology, 41(10).  
1026 <https://www.cabdirect.org/cabdirect/abstract/19521100495>  
1027
- 1028 Groenteman R, Forgie SA, Hoddle MS, Ward DF, Goeke DF, Anand N (2015) Assessing  
1029 invasion threats: novel insect-pathogen-natural enemy associations with native New  
1030 Zealand plants in southern California. Biological Invasions, 17(5), 1299–1305.  
1031 <https://doi.org/10.1007/s10530-014-0804-0>  
1032
- 1033 Gutiérrez Hernández O and García LV (2018) Incidencia de *Xylella fastidiosa* en las Islas  
1034 Baleares y distribución potencial en la península ibérica. Investigaciones Geográficas  
1035 (Esp), (69), 55-72. <https://www.redalyc.org/articulo.oa?id=17656164004>  
1036
- 1037 Harper SJ, Ward LI, Clover GRG (2010) Development of LAMP and real-time PCR methods for  
1038 the rapid detection of *Xylella fastidiosa* for quarantine and field applications.  
1039 Phytopathology, 100(12), 1282–1288. <https://doi.org/10.1094/PHYTO-06-10-0168>  
1040
- 1041 Holland RM, Christiano RSC, Gamliel-Atinsky E, Scherm H (2014) Distribution of *Xylella*  
1042 *fastidiosa* in Blueberry Stem and Root Sections in Relation to Disease Severity in the  
1043 Field. Plant Disease, 98(4), 443–447. <https://doi.org/10.1094/PDIS-06-13-0680-RE>  
1044

- 1045 Keane RM and Crawley MJ (2002) Exotic plant invasions and the enemy release hypothesis.  
1046 Trends in Ecology & Evolution, 17(4), 164–170. [https://doi.org/10.1016/S0169-](https://doi.org/10.1016/S0169-5347(02)02499-0)  
1047 [5347\(02\)02499-0](https://doi.org/10.1016/S0169-5347(02)02499-0)  
1048
- 1049 Kenis M, Rabitsch W, Auger-Rozenberg MA, Roques A (2007) How can alien species  
1050 inventories and interception data help us prevent insect invasions? Bulletin of  
1051 Entomological Research, 97(5), 489–502. <https://doi.org/10.1017/S0007485307005184>  
1052
- 1053 Liebhold AM, Brockerhoff EG, Garrett LJ, Parke JL, Britton KO (2012) Live plant imports: the  
1054 major pathway for forest insect and pathogen invasions of the US. Frontiers in Ecology  
1055 and the Environment, 10(3), 135–143. <https://doi.org/10.1890/110198>  
1056
- 1057 López-Mercadal J, Delgado S, Mercadal P, Seguí G, Busquets A, Gomila M, Lester K, Kenyon  
1058 DM, Pérez R, Paredes-Esquivel C and Miranda MA (2021) Collection of data and  
1059 information in Balearic Islands on biology of vectors and potential vectors of *Xylella*  
1060 *fastidiosa* (GP/EFSA/ALPHA/017/01). EFSA Supporting Publications, 18(10), 6925E.  
1061 <https://doi.org/10.2903/sp.efsa.2021.EN-6925>  
1062
- 1063 Manfredini F, Grozinger CM, Beani L (2013) Examining the “evolution of increased competitive  
1064 ability” hypothesis in response to parasites and pathogens in the invasive paper wasp  
1065 *Polistes dominula*. Naturwissenschaften, 100(3), 219–228.  
1066 <https://doi.org/10.1007/S00114-013-1014-9/FIGURES/5>  
1067
- 1068 Mansfield S, McNeill MR, Aalders LT, Bell NL, Kean JM, Barratt BIP, Boyd-Wilson K, Teulon  
1069 DAJ (2019) The value of sentinel plants for risk assessment and surveillance to support  
1070 biosecurity. NeoBiota, 48, 1–24. <https://doi.org/10.3897/neobiota.48.34205>  
1071
- 1072 Meurisse N, Rassati D, Hurley BP, Brockerhoff EG, Haack RA (2019) Common pathways by  
1073 which non-native forest insects move internationally and domestically. Journal of Pest  
1074 Science, 92(1), 13–27. <https://doi.org/10.1007/S10340-018-0990-0/FIGURES/1>  
1075
- 1076 Migliorini D, Ghelardini L, Tondini E, Luchi N, Santini A (2015) The potential of symptomless  
1077 potted plants for carrying invasive soilborne plant pathogens. Diversity and Distributions,  
1078 21(10), 1218–1229. <https://doi.org/10.1111/ddi.12347>  
1079
- 1080 Minsavage GV, Thompson CM, Hopkins DL, Leite RMVBC, Stall RE (1994) Development of a  
1081 polymerase chain reaction protocol for detection of *Xylella fastidiosa* in plant tissue.  
1082 Phytopathology 84(5), 456–461. <https://doi.org/10.1094/Phyto-84-456>  
1083
- 1084 Moralejo E, Gomila M, Montesinos M, Borràs D, Pascual A, Nieto A, Adrover F, Gost PA, Seguí  
1085 G, Busquets A, Jurado-Rivera JA, Quetglas B, García J de D, Beidas O, Juan A, Velasco-  
1086 Amo MP, Landa BB, Olmo D (2020) Phylogenetic inference enables reconstruction of a  
1087 long-overlooked outbreak of almond leaf scorch disease (*Xylella fastidiosa*) in Europe.  
1088 Communications Biology 2020 3:1, 3(1), 1–13. [https://doi.org/10.1038/s42003-020-](https://doi.org/10.1038/s42003-020-01284-7)  
1089 [01284-7](https://doi.org/10.1038/s42003-020-01284-7)  
1090

- 1091 Nunney L, Ortiz B, Russell SA, Sánchez R, Stouthamer R (2014) The complex biogeography of  
1092 the plant pathogen *Xylella fastidiosa*: Genetic evidence of introductions and subspecific  
1093 introgression in Central America. PLoS ONE, 9(11), 112463.  
1094 <https://doi.org/10.1371/journal.pone.0112463>  
1095
- 1096 Olmo D, Nieto A, Adrover F, Urbano A, Beidas O, Juan A, Marco-Noales E, López MM,  
1097 Navarro I, Monterde A, Montes-Borrego M, Navas-Cortés JA, Landa BB (2017)  
1098 First detection of *Xylella fastidiosa* infecting cherry (*Prunus avium*) and *Polygala*  
1099 *myrtifolia* plants in Mallorca Island Spain. Plant Disease, 101(10), 1820.  
1100 <https://doi.org/10.1094/PDIS-04-17-0590-PDN>  
1101
- 1102 Olmo D, Nieto A, Borràs D, Montesinos M, Adrover F, Pascual A, Gost PA, Quetglas B, Urbano  
1103 A, García J de D, Velasco-Amo MP, Olivares-García C, Beidas O, Juan A, Marco-Noales  
1104 E, Gomila M, Rita J, Moralejo E, Landa BB (2021) Landscape Epidemiology of *Xylella*  
1105 *fastidiosa* in the Balearic Islands. Agronomy 2021, Vol. 11, Page 473, 11(3), 473.  
1106 <https://doi.org/10.3390/AGRONOMY11030473>  
1107
- 1108 Parker IM, Simberloff D, Lonsdale WM, Goodell K, Wonham M, Kareiva PM, Williamson MH,  
1109 von Holle B, Moyle PB, Byers JE, Goldwasser L (1999) Impact: toward a framework for  
1110 understanding the ecological effects of invaders. Biological Invasions, 1(1), 3-19.  
1111 <https://doi.org/10.1023/A:1010034312781>  
1112
- 1113 Pimentel D, Mcnair S, Janecka J, Wightman J, Simmonds C, O'connell C, Wong E, Russel L,  
1114 Zern J, Aquino T, Tsomondo T (2001) Economic and environmental threats of alien plant,  
1115 animal, and microbe invasions. Ecosystems and Environment, 84(1), 1-20.  
1116 [https://doi.org/10.1016/S0167-8809\(00\)00178-X](https://doi.org/10.1016/S0167-8809(00)00178-X)  
1117
- 1118 Prado SDS, Lopes JRS, Demétrio CGB, Borgatto AF, Almeida RPD (2008) Host colonization  
1119 differences between citrus and coffee isolates of *Xylella fastidiosa* in reciprocal  
1120 inoculation. Scientia Agricola, 65(3), 251–258. [https://doi.org/10.1590/S0103-](https://doi.org/10.1590/S0103-90162008000300005)  
1121 [90162008000300005](https://doi.org/10.1590/S0103-90162008000300005)  
1122
- 1123 Purcell AH, & Finlay, A (1979) Evidence for Noncirculative Transmission of Pierce's Disease  
1124 Bacterium by Sharpshooter Leafhoppers. Phytopathology, 69(4), 393.  
1125 [https://www.apsnet.org/publications/phytopathology/backissues/Documents/1979Articles/](https://www.apsnet.org/publications/phytopathology/backissues/Documents/1979Articles/Phyto69n04_393.PDF)  
1126 [Phyto69n04\\_393.PDF](https://www.apsnet.org/publications/phytopathology/backissues/Documents/1979Articles/Phyto69n04_393.PDF)  
1127
- 1128 Rathé AA, Pilkington LJ, Hoddle MS, Spohr LJ, Daugherty MP, Gurr GM (2014) Feeding and  
1129 development of the glassy-winged sharpshooter, *Homalodisca vitripennis*, on Australian  
1130 native plant species and implications for Australian biosecurity. PLOS ONE, 9(3),  
1131 e90410. <https://doi.org/10.1371/JOURNAL.PONE.0090410>  
1132
- 1133 Redak RA, Purcell AH, Lopes JRS, Blua MJ, Mizell III RF, Andersen PC (2004) The biology of  
1134 xylem fluid-feeding insect vectors of *Xylella fastidiosa* and their relation to disease  
1135 epidemiology. Annual Review of Entomology, 49(1), 243–270.  
1136 <https://doi.org/10.1146/annurev.ento.49.061802.123403>  
1137

- 1138 Roques A, Fan JT, Courtial B, Zhang YZ, Yart A, Auger-Rozenberg MA, Denux O, Kenis M,  
1139 Baker R, Sun JH (2015) Planting sentinel European trees in Eastern Asia as a novel  
1140 method to identify potential insect pest invaders. PLoS ONE, 10(5), 1–19.  
1141 <https://doi.org/10.1371/journal.pone.0120864>  
1142
- 1143 Santini A, Ghelardini L, De Pace C, Desprez-Loustau ML, Capretti P, Chandelier A, Cech T,  
1144 Chira, D, Diamandis S, Gaitniekis T, Hantula J, Holdenrieder O, Jankovsky L, Jung T,  
1145 Jurc D, Kirisits T, Kunca A, Lygis V, Malecka M, ... Stenlid J (2013) Biogeographical  
1146 patterns and determinants of invasion by forest pathogens in Europe. New Phytologist,  
1147 197(1), 238–250. <https://doi.org/10.1111/j.1469-8137.2012.04364.x>  
1148 1152
- 1149 Saponari M, Boscia D, Altamura G, Loconsole G, Zicca S, D’Attoma G, Morelli M, Palmisano F,  
1150 Saponari A, Tavano D, Savino VN, Dongiovanni C, Martelli GP (2017) Isolation and  
1151 pathogenicity of *Xylella fastidiosa* associated to the olive quick decline syndrome in  
1152 southern Italy. Scientific Reports, 7(1), 1–13. <https://doi.org/10.1038/s41598-017-17957-z>  
1153
- 1154 Saponari M, D’Attoma G, Abou Kubaa R, Loconsole G, Altamura G, Zicca S, Rizzo D, Boscia D  
1155 (2019) A new variant of *Xylella fastidiosa* subspecies multiplex detected in different host  
1156 plants in the recently emerged outbreak in the region of Tuscany, Italy. European Journal  
1157 of Plant Pathology, 154(4), 1195–1200. <https://doi.org/10.1007/s10658-019-01736-9>  
1158
- 1159 Saponari M, Giampetruzzi A, Loconsole G, Boscia D, Saldarelli P (2019) *Xylella fastidiosa* in  
1160 olive in apulia: Where we stand. Phytopathology, 109(2), 175–186.  
1161 <https://doi.org/10.1094/PHYTO-08-18-0319-FI>  
1162
- 1163 Scally M, Schuenzel EL, Stouthamer R, Nunney L (2005) Multilocus sequence type system for  
1164 the plant pathogen *Xylella fastidiosa* and relative contributions of recombination and point  
1165 mutation to clonal diversity. Applied and Environmental Microbiology, 71(12), 8491–  
1166 8499. <https://doi.org/10.1128/AEM.71.12.8491-8499.2005>  
1167
- 1168 Schaad NW, Postnikova E, Lacy G, Fatmi M, Chang CJ (2004) *Xylella fastidiosa* subspecies: *X.*  
1169 *fastidiosa* subsp. *piercei*, subsp. nov., *X. fastidiosa* subsp. *multiplex* subsp. nov., and *X.*  
1170 *fastidiosa* subsp. *pauc*a subsp. nov. Systematic and Applied Microbiology, 27(3), 290–  
1171 300. <https://doi.org/10.1078/0723-2020-00263>  
1172
- 1173 Simberloff D, Martin JL, Genovesi P, Maris V, Wardle DA, Aronson J, Courchamp F, Galil B,  
1174 García-Berthou E, Pascal M, Pyšek P, Sousa R, Tabacchi E, Vilà M (2013) Impacts of  
1175 biological invasions: what’s what and the way forward. Trends in Ecology & Evolution,  
1176 28(1), 58–66. <https://doi.org/10.1016/J.TREE.2012.07.013>  
1177
- 1178 Soliman T, Mourits MCM, van der Werf W, Hengeveld GM, Robinet C, Lansink AGJMO (2012)  
1179 Framework for modelling economic impacts of invasive species, applied to pine wood  
1180 nematode in Europe. PLOS ONE, 7(9), e45505.  
1181 <https://doi.org/10.1371/JOURNAL.PONE.0045505>  
1182

- 1183 Steiner G and Buhner EM (1934) *Aphelenchoides xylophilus* n. sp., a nematode associated with  
1184 blue-stain and other fungi in timber. *Journal of Agricultural Research*, 48(10), 949–951.  
1185 <https://naldc.nal.usda.gov/download/IND43968533/PDF>  
1186
- 1187 Stergiopoulos L and Gordon TR (2014) Cryptic fungal infections: The hidden agenda of plant  
1188 pathogens. *Frontiers in Plant Science*, 5, 506.  
1189 <https://doi.org/10.3389/FPLS.2014.00506/BIBTEX>  
1190
- 1191 Strona G, Carstens CJ, Beck PSA (2017) Network analysis reveals why *Xylella fastidiosa* will  
1192 persist in Europe. *Scientific Reports*, 7(1), 1–8. [https://doi.org/10.1038/s41598-017-](https://doi.org/10.1038/s41598-017-00077-z)  
1193 [00077-z](https://doi.org/10.1038/s41598-017-00077-z)  
1194
- 1195 Tomoshevich M, Kirichenko N, Holmes K, Kenis M (2013) Foliar fungal pathogens of European  
1196 woody plants in Siberia: an early warning of potential threats? *Forest Pathology*,  
1197 43(5),345-359. <https://doi.org/10.1111/efp.12036>  
1198
- 1199 Vettraino AM, Roques A, Yart A, Fan JT, Sun JH, Vannini A (2015) Sentinel trees as a tool to  
1200 forecast invasions of alien plant pathogens. *PLoS ONE*, 10(3), 1–15.  
1201 <https://doi.org/10.1371/journal.pone.0120571>  
1202
- 1203 Vettraino AM, Santini A, Nikolov C, Grégoire JC, Tomov R, Orlinski A, Maaten T, Sverrisson  
1204 H, Økland B, Eschen R (2020) A worldwide perspective of the legislation and regulations  
1205 governing sentinel plants. *Biological Invasions*, 22(2), 353–362.  
1206 <https://doi.org/10.1007/S10530-019-02098-3/FIGURES/2>  
1207
- 1208 Walther GR, Roques A, Hulme PE, Sykes MT, Pyšek P, Kühn I, Zobel M, Bacher S, Botta-  
1209 Dukát Z, Bugmann H, Czucz B, Dauber J, Hickler T, Jarošík V, Kenis M, Klotz S,  
1210 Minchin D, Moora M, Nentwig W, ... Settele J (2009) Alien species in a warmer world:  
1211 risks and opportunities. *Trends in Ecology and Evolution*, 24(12), 686–693.  
1212 <https://doi.org/10.1016/j.tree.2009.06.008>  
1213
- 1214 Wells JM, Raju BC, Hung H-Y, Weisburg WG, Mandelco-Paul L, Brenner DJ (1987) *Xylella*  
1215 *fastidiosa* gen. nov., sp. nov: Gram-negative, xylem-limited, fastidious plant bacteria  
1216 related to *Xanthomonas* spp. *International Journal of Systematic Bacteriology*, 37(2),  
1217 136–143. <https://doi.org/10.1099/00207713-37-2-136>  
1218
- 1219 XF-ACTORS (2017) Screening of olive cultivars for searching sources of resistance to *Xylella*  
1220 *fastidiosa*. <https://www.xfactorsproject.eu/screening-cultivars-resistance-xf/> [Accessed on  
1221 06.06.2022]  
1222
- 1223 Yuan X, Morano L, Bromley R, Spring-pearson S, Stouthamer R, Nunney L (2010) Multilocus  
1224 sequence typing of *Xylella fastidiosa* causing Pierce’s disease and oleander leaf scorch in  
1225 the United States. *Phytopathology*, 100(6), 601–611. [https://doi.org/10.1094/PHYTO-](https://doi.org/10.1094/PHYTO-100-6-0601)  
1226 [100-6-0601](https://doi.org/10.1094/PHYTO-100-6-0601)  
1227



1228 Zhao BG, Futai K, Sutherland JR, Takeuchi Y (2008) Pine wilt disease. Springer (ed.), Tokyo  
1229 Japan, Vol. 17, p. 459. [https://link.springer.com/book/10.1007/978-4-431-75655-](https://link.springer.com/book/10.1007/978-4-431-75655-2?noAccess=true)  
1230 [2?noAccess=true](https://link.springer.com/book/10.1007/978-4-431-75655-2?noAccess=true)
